# Supplementary material for: The macronutrient and micronutrient (iron and manganese) content of icebergs
Source: Copernicus journal article supplement (doi:10.5194/tc-18-5735-2024), 2024-12-10
Supplement: Supplementary file 1 [file tc-18-5735-2024-supplement.zip]

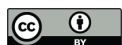

## *Supplement of*

# **The macronutrient and micronutrient (iron and manganese) content of icebergs**

**Jana Krause et al.**

*Correspondence to:* Mark J. Hopwood ([mark@sustech.edu.cn](mailto:mark@sustech.edu.cn))

- [tc-18-5735-2024-supplement-title-page.pdf](#)
- [Compiled iceberg data for Krause et al.xlsx](#)
- [Krause et al., Icebergs Supplement.pdf](#)

The copyright of individual parts of the supplement might differ from the article licence.
