# Supplementary material for: The macronutrient and micronutrient (iron and manganese) content of icebergs
Source: Copernicus journal article supplement (doi:10.5194/tc-18-5735-2024), 2024-12-10
Supplement: Supplementary file 1 [file tc-18-5735-2024-supplement.zip]

## Sheet: All icebergs
Sample label	Reference (if published-partially or completely as per article reference list)	Catchment	Region	Month	Year	dFe [nM]	dFe_QC	TdFe [nM]	TdFe_QC	dMn [nM]	dMn_QC	Mn / Total / nM	TdMn [nM]	PO4 [µM]	PO4_QC	NOX [µM]	NOx_QC	NO3 [µM]	NO3_QC	dSi [µM]	dSi_QC	dry mass mg/L
Ice 1	Hopwood et al., Geochemical Perspectives Letters, 2017	Kongsfjorden	Svalbard	7	2015	19.2423	2	260.973	2	n/d	9	n/d	9	<LOD	6	<LOD	6	n/d	9	<LOD	6	n/d
Ice 2	Hopwood et al., Geochemical Perspectives Letters, 2017	Kongsfjorden	Svalbard	7	2015	9.5393	2	96.9578	2	n/d	9	n/d	9	<LOD	6	<LOD	6	n/d	9	<LOD	6	n/d
Ice 3	Hopwood et al., Geochemical Perspectives Letters, 2017	Kongsfjorden	Svalbard	7	2015	1.31617	2	368.698	2	n/d	9	n/d	9	<LOD	6	<LOD	6	n/d	9	<LOD	6	n/d
Ice 4	Hopwood et al., Geochemical Perspectives Letters, 2017	Kongsfjorden	Svalbard	7	2015	7.94417	2	1012.62	2	n/d	9	n/d	9	<LOD	6	<LOD	6	n/d	9	<LOD	6	n/d
Ice 5	Hopwood et al., Geochemical Perspectives Letters, 2017	Kongsfjorden	Svalbard	7	2015	4.93718	2	331.046	2	n/d	9	n/d	9	0.0735956	1	0.869466	1	n/d	9	0.0500046	1	n/d
Ice 6	Hopwood et al., Geochemical Perspectives Letters, 2017	Kongsfjorden	Svalbard	7	2015	0.63135	2	133.242	2	n/d	9	n/d	9	0.0433668	1	2.61983	1	n/d	9	<LOD	6	n/d
Ice 7	Hopwood et al., Geochemical Perspectives Letters, 2017	Kongsfjorden	Svalbard	7	2015	3.15496	2	377.217	2	n/d	9	n/d	9	n/d	9	n/d	9	n/d	9	n/d	9	n/d
Ice 8	Hopwood et al., Geochemical Perspectives Letters, 2017	Kongsfjorden	Svalbard	7	2015	2.01173	2	108.735	2	n/d	9	n/d	9	n/d	9	n/d	9	n/d	9	n/d	9	n/d
Ice 9	Hopwood et al., Geochemical Perspectives Letters, 2017	Kongsfjorden	Svalbard	7	2015	2.07173	2	54.2915	2	n/d	9	n/d	9	n/d	9	n/d	9	n/d	9	n/d	9	n/d
Ice 10	Hopwood et al., Geochemical Perspectives Letters, 2017	Kongsfjorden	Svalbard	7	2015	6.37078	2	896.668	2	n/d	9	n/d	9	<LOD	6	0.941159	6	n/d	9	0.0271	1	n/d
Ice 11	Hopwood et al., Geochemical Perspectives Letters, 2017	Kongsfjorden	Svalbard	7	2015	16.4626	2	2273.88	2	n/d	9	n/d	9	0.0354044	1	113	4	n/d	9	0.166442	1	n/d
Ice 12	Hopwood et al., Geochemical Perspectives Letters, 2017	Kongsfjorden	Svalbard	7	2015	6.60526	2	470.42	2	n/d	9	n/d	9	0.0962524	1	2.07392	1	n/d	9	0.0715417	1	n/d
Ice 13	Hopwood et al., Geochemical Perspectives Letters, 2017	Kongsfjorden	Svalbard	7	2015	9.6612	2	23259.5	2	n/d	9	n/d	9	0.0843384	1	0.500125	1	n/d	9	0.0391334	1	n/d
Ice 14	Hopwood et al., Geochemical Perspectives Letters, 2017	Kongsfjorden	Svalbard	7	2015	7.97451	2	221.402	2	n/d	9	n/d	9	0.0755832	1	0.84791	1	n/d	9	<LOD	6	n/d
Ice 15	Hopwood et al., Geochemical Perspectives Letters, 2017	Kongsfjorden	Svalbard	7	2015	3.69541	2	48.7047	2	n/d	9	n/d	9	0.0218576	1	0.683279	1	n/d	9	<LOD	6	n/d
Ice 16	Hopwood et al., Geochemical Perspectives Letters, 2017	Kongsfjorden	Svalbard	7	2015	3.91837	2	59.0531	2	n/d	9	n/d	9	0.0659053	1	0.625694	1	n/d	9	0.0374925	1	n/d
Ice 17	Hopwood et al., Geochemical Perspectives Letters, 2017	Kongsfjorden	Svalbard	7	2015	11.0886	2	61.7159	2	n/d	9	n/d	9	0.0392259	1	4.15526	1	n/d	9	<LOD	6	n/d
Ice 18	Hopwood et al., Geochemical Perspectives Letters, 2017	Kongsfjorden	Svalbard	7	2015	9.4949	2	46.369	2	n/d	9	n/d	9	0.0914726	1	2.71268	1	n/d	9	0.0724989	1	n/d
Ice 19	Hopwood et al., Geochemical Perspectives Letters, 2017	Kongsfjorden	Svalbard	7	2015	12.3708	2	65.2096	2	n/d	9	n/d	9	0.0391667	1	1.10082	1	n/d	9	0.0228609	1	n/d
Ice 20	Hopwood et al., Geochemical Perspectives Letters, 2017	Kongsfjorden	Svalbard	7	2015	5.37603	2	78.7785	2	n/d	9	n/d	9	<LOD	6	0.397975	1	n/d	9	<LOD	6	n/d
Ice 21	Hopwood et al., Geochemical Perspectives Letters, 2017	Kongsfjorden	Svalbard	7	2015	536.341	2	57400.7	2	n/d	9	n/d	9	0.0321153	1	0.301632	1	n/d	9	0.0395437	1	n/d
Ice 22	Hopwood et al., Geochemical Perspectives Letters, 2017	Kongsfjorden	Svalbard	7	2015	54.7047	2	76.7543	2	n/d	9	n/d	9	<LOD	6	0.542445	1	n/d	9	<LOD	6	n/d
Ice 23	Hopwood et al., Geochemical Perspectives Letters, 2017	Kongsfjorden	Svalbard	7	2015	4.09816	2	155.511	2	n/d	9	n/d	9	<LOD	6	0.196703	1	n/d	9	<LOD	6	n/d
Ice 24	Hopwood et al., Geochemical Perspectives Letters, 2017	Kongsfjorden	Svalbard	7	2015	1.40524	2	98.5513	2	n/d	9	n/d	9	<LOD	6	0.179811	1	n/d	9	<LOD	6	n/d
Ice 25	Hopwood et al., Geochemical Perspectives Letters, 2017	Kongsfjorden	Svalbard	7	2015	1.37028	2	107.41	2	n/d	9	n/d	9	<LOD	6	0.952898	1	n/d	9	<LOD	6	n/d
Ice 26	Hopwood et al., Geochemical Perspectives Letters, 2017	Kongsfjorden	Svalbard	7	2015	3.36226	2	87.5296	2	n/d	9	n/d	9	<LOD	6	0.269084	1	n/d	9	<LOD	6	n/d
Ice 27	Hopwood et al., Geochemical Perspectives Letters, 2017	Kongsfjorden	Svalbard	7	2015	16.5319	2	830.384	2	n/d	9	n/d	9	0.0340674	1	0.461812	1	n/d	9	<LOD	6	n/d
Ice 28	Hopwood et al., Geochemical Perspectives Letters, 2017	Kongsfjorden	Svalbard	7	2015	266.076	2	10875.8	2	n/d	9	n/d	9	<LOD	6	0.3903	1	n/d	9	<LOD	6	n/d
Greenland 1	Hopwood et al., Nat. Commun., 2019	Godthabsfjord	Greenland	7	2015	n/d	9	35.3778	2	n/d	9	n/d	9	0.04	1	1.93	1	1.92	1	0.781542	1	n/d
Greenland 2	Hopwood et al., Nat. Commun., 2019	Godthabsfjord	Greenland	7	2015	n/d	9	10.8513	2	n/d	9	n/d	9	0.03	1	0.37	1	0.36	1	0.185149	1	n/d
Greenland 3	Hopwood et al., Nat. Commun., 2019	Godthabsfjord	Greenland	7	2015	n/d	9	60.6498	2	n/d	9	n/d	9	0.04	1	1.55	1	1.54	1	0.172687	1	n/d
Greenland 4	Hopwood et al., Nat. Commun., 2019	Godthabsfjord	Greenland	7	2015	n/d	9	23.7621	2	n/d	9	n/d	9	0.03	1	1.83	1	1.82	1	0.0676506	1	n/d
Greenland 5	Hopwood et al., Nat. Commun., 2019	Godthabsfjord	Greenland	7	2015	n/d	9	22.7575	2	n/d	9	n/d	9	0.03	1	1.8	1	1.79	1	0.121059	1	n/d
Greenland 6	Hopwood et al., Nat. Commun., 2019	Godthabsfjord	Greenland	7	2015	n/d	9	27.5422	2	n/d	9	n/d	9	0.03	1	1.84	1	1.83	1	0.101476	1	n/d
Greenland 7	Hopwood et al., Nat. Commun., 2019	Godthabsfjord	Greenland	7	2015	n/d	9	11.8709	2	n/d	9	n/d	9	0.02	1	0.4	1	0.39	1	0.213633	1	n/d
Greenland 8	Hopwood et al., Nat. Commun., 2019	Godthabsfjord	Greenland	7	2015	n/d	9	24.5531	2	n/d	9	n/d	9	0.03	1	1.6	1	1.59	1	0.0587492	1	n/d
Greenland 9	Hopwood et al., Nat. Commun., 2019	Godthabsfjord	Greenland	7	2015	n/d	9	2.12315	2	n/d	9	n/d	9	0.02	1	1.11	1	1.1	1	0.0694308	1	n/d
Greenland 10	Hopwood et al., Nat. Commun., 2019	Godthabsfjord	Greenland	7	2015	n/d	9	10.4618	2	n/d	9	n/d	9	0.03	1	0.2	1	0.19	1	0.0907942	1	n/d
Greenland 11	Hopwood et al., Nat. Commun., 2019	Godthabsfjord	Greenland	7	2015	n/d	9	49.9396	2	n/d	9	n/d	9	0.02	1	1.69	1	1.68	1	0.133521	1	n/d
Greenland 12	Hopwood et al., Nat. Commun., 2019	Godthabsfjord	Greenland	7	2015	n/d	9	16.5825	2	n/d	9	n/d	9	0.03	1	3.05	1	3.04	1	0.156664	1	n/d
Greenland 13	Hopwood et al., Nat. Commun., 2019	Godthabsfjord	Greenland	7	2015	n/d	9	2636.55	2	n/d	9	n/d	9	0.06	1	3.03	1	3.01	1	0.316889	1	n/d
Greenland 14	Hopwood et al., Nat. Commun., 2019	Godthabsfjord	Greenland	7	2015	n/d	9	135.522	2	n/d	9	n/d	9	0.075	1	1.77	1	1.76	1	0.290185	1	n/d
Greenland 15	Hopwood et al., Nat. Commun., 2019	Godthabsfjord	Greenland	7	2015	n/d	9	97.3702	2	n/d	9	n/d	9	0.04	1	4.29	1	4.27	1	0.466433	1	n/d
Greenland 16	Hopwood et al., Nat. Commun., 2019	Godthabsfjord	Greenland	7	2015	n/d	9	22.7607	2	n/d	9	n/d	9	0.035	1	3.09	1	3.08	1	0.185149	1	n/d
Greenland 17	Hopwood et al., Nat. Commun., 2019	Godthabsfjord	Greenland	7	2015	n/d	9	1019.01	2	n/d	9	n/d	9	0.05	1	1.77	1	1.76	1	0.06409	1	n/d
Greenland 18	Hopwood et al., Nat. Commun., 2019	Godthabsfjord	Greenland	7	2015	n/d	9	4159.88	2	n/d	9	n/d	9	0.09	1	1.685	1	1.675	1	0.393441	1	n/d
Greenland 19	Hopwood et al., Nat. Commun., 2019	Godthabsfjord	Greenland	7	2015	n/d	9	2396.92	2	n/d	9	n/d	9	0.07	1	1.96	1	1.94	1	0.810027	1	n/d
Greenland 20	Hopwood et al., Nat. Commun., 2019	Godthabsfjord	Greenland	7	2015	n/d	9	4.54048	2	n/d	9	n/d	9	0.04	1	1.39	1	1.38	1	0.416585	1	n/d
Greenland 21	Hopwood et al., Nat. Commun., 2019	Godthabsfjord	Greenland	7	2015	n/d	9	151.823	2	n/d	9	n/d	9	0.06	1	1.19	1	1.18	1	0.188709	1	n/d
UP1	Hopwood et al., Nat. Commun., 2019	Upernavik	Greenland	8	2016	n/d	9	45.8967	2	n/d	9	n/d	9	0.05	1	0.29	1	0.28	1	0.06	1	n/d
UP2	Hopwood et al., Nat. Commun., 2019	Upernavik	Greenland	8	2016	n/d	9	5087.49	2	n/d	9	n/d	9	0.05	1	1.09	1	1.08	1	0.07	1	n/d
UP3	Hopwood et al., Nat. Commun., 2019	Upernavik	Greenland	8	2016	n/d	9	86.0342	2	n/d	9	n/d	9	0.04	1	0.19	1	0.19	1	0	1	n/d
UP4	Hopwood et al., Nat. Commun., 2019	Upernavik	Greenland	8	2016	n/d	9	914.073	2	n/d	9	n/d	9	0.09	1	0.6	1	0.6	1	0.08	1	n/d
UP5	Hopwood et al., Nat. Commun., 2019	Upernavik	Greenland	8	2016	n/d	9	199.85	2	n/d	9	n/d	9	0.06	1	1	1	1	1	0.04	1	n/d
UP6	Hopwood et al., Nat. Commun., 2019	Upernavik	Greenland	8	2016	n/d	9	53.8867	2	n/d	9	n/d	9	0.02	1	1.64	1	1.64	1	<LOD	6	n/d
UP7	Hopwood et al., Nat. Commun., 2019	Upernavik	Greenland	8	2016	n/d	9	18.4038	2	n/d	9	n/d	9	0.02	1	1.18	1	1.18	1	<LOD	6	n/d
UP8	Hopwood et al., Nat. Commun., 2019	Upernavik	Greenland	8	2016	n/d	9	30617.3	2	n/d	9	n/d	9	0.25	1	0.14	1	0.06	1	0.45	1	n/d
UM1	Hopwood et al., Nat. Commun., 2019	Uumanaaq	Greenland	8	2016	n/d	9	47.1368	2	n/d	9	n/d	9	0.04	1	1.05	1	1.05	1	<LOD	6	n/d
UM2	Hopwood et al., Nat. Commun., 2019	Uumanaaq	Greenland	8	2016	n/d	9	62.2893	2	n/d	9	n/d	9	0.03	1	0.06	1	0.06	1	<LOD	6	n/d
UM3	Hopwood et al., Nat. Commun., 2019	Uumanaaq	Greenland	8	2016	n/d	9	93.9343	2	n/d	9	n/d	9	<LOD	6	0.14	1	0.14	1	<LOD	6	n/d
UM4	Hopwood et al., Nat. Commun., 2019	Uumanaaq	Greenland	8	2016	n/d	9	97.7024	2	n/d	9	n/d	9	0.03	1	0.07	1	0.07	1	<LOD	6	n/d
UM5	Hopwood et al., Nat. Commun., 2019	Uumanaaq	Greenland	8	2016	n/d	9	39.5717	2	n/d	9	n/d	9	0.02	1	1.07	1	1.07	1	0.01	1	n/d
UM6	Hopwood et al., Nat. Commun., 2019	Uumanaaq	Greenland	8	2016	n/d	9	71.4661	2	n/d	9	n/d	9	0.04	1	0.11	1	0.11	1	0.04	1	n/d
UM7	Hopwood et al., Nat. Commun., 2019	Uumanaaq	Greenland	8	2016	n/d	9	49.1987	2	n/d	9	n/d	9	0.02	1	0.09	1	0.09	1	0.03	1	n/d
UM8	Hopwood et al., Nat. Commun., 2019	Uumanaaq	Greenland	8	2016	n/d	9	49.5337	2	n/d	9	n/d	9	0.03	1	0.05	1	0.05	1	0.01	1	n/d
IL1	Hopwood et al., Nat. Commun., 2019	Ilulissat	Greenland	8	2016	n/d	9	54.8126	2	n/d	9	n/d	9	0.04	1	1.15	1	1.15	1	0.01	1	n/d
IL2	Hopwood et al., Nat. Commun., 2019	Ilulissat	Greenland	8	2016	n/d	9	29.766	2	n/d	9	n/d	9	0.02	1	0.6	1	0.6	1	<LOD	6	n/d
EQ1	Hopwood et al., Nat. Commun., 2019	Eqip Glacier	Greenland	8	2016	n/d	9	268.947	2	n/d	9	n/d	9	0.04	1	0.52	1	0.52	1	<LOD	6	n/d
EQ2	Hopwood et al., Nat. Commun., 2019	Eqip Glacier	Greenland	8	2016	n/d	9	195.789	2	n/d	9	n/d	9	0.03	1	0.1	1	0.1	1	<LOD	6	n/d
EQ3	Hopwood et al., Nat. Commun., 2019	Eqip Glacier	Greenland	8	2016	n/d	9	317.653	2	n/d	9	n/d	9	0.02	1	1.1	1	1.1	1	<LOD	6	n/d
EQ4	Hopwood et al., Nat. Commun., 2019	Eqip Glacier	Greenland	8	2016	n/d	9	158.307	2	n/d	9	n/d	9	0.03	1	0.07	1	0.07	1	<LOD	6	n/d
UP9	Hopwood et al., Nat. Commun., 2019	Upernavik	Greenland	8	2016	n/d	9	244214	2	n/d	9	n/d	9	0.34	1	0.89	1	0.77	1	0.81	1	n/d
1	Hopwood et al., Frontiers in Earth Science 2016	Godthabsfjord	Greenland	5	2014	<LOD	6	n/d	9	n/d	9	n/d	9	n/d	9	n/d	9	n/d	9	n/d	9	n/d
2	Hopwood et al., Frontiers in Earth Science 2016	Godthabsfjord	Greenland	5	2014	32.5497	2	n/d	9	n/d	9	n/d	9	n/d	9	n/d	9	n/d	9	n/d	9	n/d
3	Hopwood et al., Frontiers in Earth Science 2016	Godthabsfjord	Greenland	5	2014	n/d	9	145.513	2	n/d	9	n/d	9	n/d	9	n/d	9	n/d	9	n/d	9	n/d
4	Hopwood et al., Frontiers in Earth Science 2016	Godthabsfjord	Greenland	5	2014	16.6734	2	n/d	9	n/d	9	n/d	9	<LOD	6	n/d	9	1.65	1	<LOD	6	n/d
5	Hopwood et al., Frontiers in Earth Science 2016	Godthabsfjord	Greenland	5	2014	n/d	9	88.1864	2	n/d	9	n/d	9	0.07	1	n/d	9	1.47	1	<LOD	6	n/d
6	Hopwood et al., Frontiers in Earth Science 2016	Godthabsfjord	Greenland	5	2014	n/d	9	n/d	9	n/d	9	n/d	9	0.11	1	n/d	9	2.85	1	<LOD	6	n/d
7	Hopwood et al., Frontiers in Earth Science 2016	Godthabsfjord	Greenland	5	2014	n/d	9	n/d	9	n/d	9	n/d	9	0.13	1	n/d	9	1.36	1	<LOD	6	n/d
8	Hopwood et al., Frontiers in Earth Science 2016	Godthabsfjord	Greenland	5	2014	12.1532	2	137.785	2	n/d	9	n/d	9	<LOD	6	n/d	9	0.57	1	<LOD	6	n/d
9	Hopwood et al., Frontiers in Earth Science 2016	Godthabsfjord	Greenland	5	2014	14.1307	2	n/d	9	n/d	9	n/d	9	0.05	1	n/d	9	6.85	1	<LOD	6	n/d
10	Hopwood et al., Frontiers in Earth Science 2016	Godthabsfjord	Greenland	5	2014	5.9909	2	n/d	9	n/d	9	n/d	9	0.02	1	n/d	9	1.59	1	<LOD	6	n/d
11	Hopwood et al., Frontiers in Earth Science 2016	Godthabsfjord	Greenland	5	2014	n/d	9	94.8204	2	n/d	9	n/d	9	<LOD	6	n/d	9	0.42	1	<LOD	6	n/d
12	Hopwood et al., Frontiers in Earth Science 2016	Godthabsfjord	Greenland	5	2014	5.36403	2	38.9805	2	n/d	9	n/d	9	<LOD	6	n/d	9	2.01	1	<LOD	6	n/d
13	Hopwood et al., Frontiers in Earth Science 2016	Godthabsfjord	Greenland	5	2014	19.5515	2	712.81	2	n/d	9	n/d	9	0.03	1	n/d	9	2.1	1	<LOD	6	n/d
14	Hopwood et al., Frontiers in Earth Science 2016	Godthabsfjord	Greenland	5	2014	304.475	2	36.5206	2	n/d	9	n/d	9	<LOD	6	n/d	9	1.19	1	<LOD	6	n/d
15	Hopwood et al., Frontiers in Earth Science 2016	Godthabsfjord	Greenland	5	2014	5.53517	2	1487.35	2	n/d	9	n/d	9	<LOD	6	n/d	9	0.48	1	<LOD	6	n/d
16	Hopwood et al., Frontiers in Earth Science 2016	Godthabsfjord	Greenland	5	2014	<LOD	6	19.0132	2	n/d	9	n/d	9	0.03	1	n/d	9	2.99	1	<LOD	6	n/d
9001a	Hopwood et al., Nat. Commun., 2019	(Bach) E Greenland	Greenland	7	2016	n/d	9	45.072	2	n/d	9	n/d	9	<LOD	6	<LOD	6	<LOD	6	0.134	1	n/d
9001b	Hopwood et al., Nat. Commun., 2019	(Bach) E Greenland	Greenland	7	2016	n/d	9	40.7688	2	n/d	9	n/d	9	<LOD	6	<LOD	6	<LOD	6	0.07	1	n/d
9001c	Hopwood et al., Nat. Commun., 2019	(Bach) E Greenland	Greenland	7	2016	n/d	9	113.157	2	n/d	9	n/d	9	<LOD	6	n/d	9	n/d	9	0.314	1	n/d
9001d	Hopwood et al., Nat. Commun., 2019	(Bach) E Greenland	Greenland	7	2016	n/d	9	47.6336	2	n/d	9	n/d	9	<LOD	6	n/d	9	n/d	9	0.179	1	n/d
9002	Hopwood et al., Nat. Commun., 2019	(Bach) E Greenland	Greenland	7	2016	n/d	9	43.8442	2	n/d	9	n/d	9	<LOD	6	n/d	9	n/d	9	0.275	1	n/d
9003	Hopwood et al., Nat. Commun., 2019	(Bach) E Greenland	Greenland	7	2016	n/d	9	3477.48	2	n/d	9	n/d	9	0.07	1	n/d	9	n/d	9	7.73	1	n/d
9004	Hopwood et al., Nat. Commun., 2019	(Bach) E Greenland	Greenland	7	2016	n/d	9	120.56	2	n/d	9	n/d	9	<LOD	6	n/d	9	n/d	9	0.45	1	n/d
9005	Hopwood et al., Nat. Commun., 2019	(Bach) E Greenland	Greenland	7	2016	n/d	9	214.141	2	n/d	9	n/d	9	0.023	1	n/d	9	n/d	9	1.372	1	n/d
9006	Hopwood et al., Nat. Commun., 2019	(Bach) E Greenland	Greenland	7	2016	n/d	9	12.286	2	n/d	9	n/d	9	<LOD	6	n/d	9	n/d	9	0.073	1	n/d
9007	Hopwood et al., Nat. Commun., 2019	(Bach) E Greenland	Greenland	7	2016	n/d	9	14.0104	2	n/d	9	n/d	9	<LOD	6	n/d	9	n/d	9	0	1	n/d
9008	Hopwood et al., Nat. Commun., 2019	(Bach) E Greenland	Greenland	7	2016	n/d	9	974.661	2	n/d	9	n/d	9	0.039	1	n/d	9	n/d	9	2.429	1	n/d
9009	Hopwood et al., Nat. Commun., 2019	(Bach) E Greenland	Greenland	7	2016	n/d	9	32.118	2	n/d	9	n/d	9	<LOD	6	n/d	9	n/d	9	0.155	1	n/d
9010	Hopwood et al., Nat. Commun., 2019	(Bach) E Greenland	Greenland	7	2016	n/d	9	63.1044	2	n/d	9	n/d	9	<LOD	6	n/d	9	n/d	9	0.246	1	n/d
9011	Hopwood et al., Nat. Commun., 2019	(Bach) E Greenland	Greenland	7	2016	n/d	9	42.8796	2	n/d	9	n/d	9	<LOD	6	n/d	9	n/d	9	0.255	1	n/d
9013	Hopwood et al., Nat. Commun., 2019	(Bach) E Greenland	Greenland	7	2016	n/d	9	n/d	9	n/d	9	n/d	9	<LOD	6	<LOD	6	<LOD	6	n/d	9	n/d
9016	Hopwood et al., Nat. Commun., 2019	(Bach) E Greenland	Greenland	7	2016	n/d	9	n/d	9	n/d	9	n/d	9	<LOD	6	<LOD	6	<LOD	6	n/d	9	n/d
9020	Hopwood et al., Nat. Commun., 2019	(Bach) E Greenland	Greenland	7	2016	n/d	9	98.4435	2	n/d	9	n/d	9	0.023	1	n/d	9	n/d	9	0.73	1	n/d
9021	Hopwood et al., Nat. Commun., 2019	(Bach) E Greenland	Greenland	7	2016	n/d	9	1757.7	2	n/d	9	n/d	9	0.153	1	n/d	9	n/d	9	15.289	1	n/d
9022	Hopwood et al., Nat. Commun., 2019	(Bach) E Greenland	Greenland	7	2016	n/d	9	1243.57	2	n/d	9	n/d	9	0.136	1	n/d	9	n/d	9	10.75	1	n/d
9023	Hopwood et al., Nat. Commun., 2019	(Bach) E Greenland	Greenland	7	2016	n/d	9	134.609	2	n/d	9	n/d	9	0.026	1	n/d	9	n/d	9	1.226	1	n/d
9028	Hopwood et al., Nat. Commun., 2019	(Bach) E Greenland	Greenland	7	2016	n/d	9	285.655	2	n/d	9	n/d	9	<LOD	6	n/d	9	n/d	9	1.976	1	n/d
9029	Hopwood et al., Nat. Commun., 2019	(Bach) E Greenland	Greenland	7	2016	n/d	9	684.114	2	n/d	9	n/d	9	0.081	1	n/d	9	n/d	9	4.824	1	n/d
9030	Hopwood et al., Nat. Commun., 2019	(Bach) E Greenland	Greenland	7	2016	n/d	9	215.518	2	n/d	9	n/d	9	0.037	1	n/d	9	n/d	9	2.664	1	n/d
9031	Hopwood et al., Nat. Commun., 2019	(Bach) E Greenland	Greenland	7	2016	n/d	9	421.564	2	n/d	9	n/d	9	0.021	1	n/d	9	n/d	9	2.615	1	n/d
9032	Hopwood et al., Nat. Commun., 2019	(Bach) E Greenland	Greenland	7	2016	n/d	9	123.183	2	n/d	9	n/d	9	<LOD	6	n/d	9	n/d	9	0.998	1	n/d
PIA Anclaje 24.10.16 Fe 6	Hopwood et al., Nat. Commun., 2019	PIA	Patagonia	10	2016	n/d	9	521.017	2	n/d	9	n/d	9	n/d	9	n/d	9	n/d	9	n/d	9	n/d
PIA Anclaje 24.10.16 Fe 6	Hopwood et al., Nat. Commun., 2019	PIA	Patagonia	10	2016	n/d	9	602.513	2	n/d	9	n/d	9	n/d	9	n/d	9	n/d	9	n/d	9	n/d
PIA Anclaje 23.10.16 Fe 5	Hopwood et al., Nat. Commun., 2019	PIA	Patagonia	10	2016	n/d	9	496.016	2	n/d	9	n/d	9	n/d	9	n/d	9	n/d	9	n/d	9	n/d
PIA Anclaje 25.10.16 Fe 3	Hopwood et al., Nat. Commun., 2019	PIA	Patagonia	10	2016	n/d	9	1837.45	2	n/d	9	n/d	9	n/d	9	n/d	9	n/d	9	n/d	9	n/d
PIA Anclaje I 23.10.16 Fe 4	Hopwood et al., Nat. Commun., 2019	PIA	Patagonia	10	2016	n/d	9	158.087	2	n/d	9	n/d	9	n/d	9	n/d	9	n/d	9	n/d	9	n/d
PIA Anclaje 23.10.16 Fe 4	Hopwood et al., Nat. Commun., 2019	PIA	Patagonia	10	2016	n/d	9	190.328	2	n/d	9	n/d	9	n/d	9	n/d	9	n/d	9	n/d	9	n/d
PIA Anclaje I 23.10.16 Fe 2	Hopwood et al., Nat. Commun., 2019	PIA	Patagonia	10	2016	n/d	9	230.89	2	n/d	9	n/d	9	n/d	9	n/d	9	n/d	9	n/d	9	n/d
PIA Anclaje I 23.10.16 Fe 2	Hopwood et al., Nat. Commun., 2019	PIA	Patagonia	10	2016	n/d	9	110.815	2	n/d	9	n/d	9	n/d	9	n/d	9	n/d	9	n/d	9	n/d
Fildes 1	Höfer et al., Progess in Oceanography, 2019	Fildes	Western Antarctic Peninsula	1	2017	n/d	9	82.5954	2	n/d	9	n/d	9	0.022	1	n/d	9	n/d	9	0.675	1	n/d
Fildes 2	Höfer et al., Progess in Oceanography, 2019	Fildes	Western Antarctic Peninsula	1	2017	n/d	9	778.214	2	n/d	9	n/d	9	0.128	1	n/d	9	n/d	9	13.277	1	n/d
Fildes 3	Höfer et al., Progess in Oceanography, 2019	Fildes	Western Antarctic Peninsula	1	2017	n/d	9	1120.1	2	n/d	9	n/d	9	0.78	1	n/d	9	n/d	9	6.121	1	n/d
Fildes 4	Höfer et al., Progess in Oceanography, 2019	Fildes	Western Antarctic Peninsula	1	2017	n/d	9	95.7324	2	n/d	9	n/d	9	0.024	1	n/d	9	n/d	9	0.696	1	n/d
Fildes 5	Höfer et al., Progess in Oceanography, 2019	Fildes	Western Antarctic Peninsula	1	2017	n/d	9	140.489	2	n/d	9	n/d	9	0.026	1	n/d	9	n/d	9	0.674	1	n/d
Yelcho 1	Höfer et al., Progess in Oceanography, 2019	Yelcho	Western Antarctic Peninsula	2	2017	n/d	9	36.9181	2	n/d	9	n/d	9	0.145	1	n/d	9	n/d	9	0.211	1	n/d
Yelcho 2	Höfer et al., Progess in Oceanography, 2019	Yelcho	Western Antarctic Peninsula	2	2017	n/d	9	14.2896	2	n/d	9	n/d	9	<LOD	6	n/d	9	n/d	9	<LOD	6	n/d
Yelcho 3	Höfer et al., Progess in Oceanography, 2019	Yelcho	Western Antarctic Peninsula	2	2017	n/d	9	93.2117	2	n/d	9	n/d	9	0.116	1	n/d	9	n/d	9	0.485	1	n/d
Yelcho 4	Höfer et al., Progess in Oceanography, 2019	Yelcho	Western Antarctic Peninsula	2	2017	n/d	9	11.6832	2	n/d	9	n/d	9	0.026	1	n/d	9	n/d	9	0.053	1	n/d
Yelcho 5	Höfer et al., Progess in Oceanography, 2019	Yelcho	Western Antarctic Peninsula	2	2017	n/d	9	726.125	2	n/d	9	n/d	9	0.031	1	n/d	9	n/d	9	2.515	1	n/d
Yelcho 6	Höfer et al., Progess in Oceanography, 2019	Yelcho	Western Antarctic Peninsula	2	2017	n/d	9	7.09185	2	n/d	9	n/d	9	<LOD	6	n/d	9	n/d	9	<LOD	6	n/d
Yelcho 7	Höfer et al., Progess in Oceanography, 2019	Yelcho	Western Antarctic Peninsula	2	2017	n/d	9	12.1458	2	n/d	9	n/d	9	0.021	1	n/d	9	n/d	9	<LOD	6	n/d
Iceland 1	Hopwood et al., Nat. Commun., 2019	Jökulsárlón	Iceland	9	2016	n/d	9	41229.7	2	n/d	9	n/d	9	0.136	1	n/d	9	n/d	9	0.653	1	n/d
Iceland 2	Hopwood et al., Nat. Commun., 2019	Jökulsárlón	Iceland	9	2016	57.7714	2	219745	2	n/d	9	n/d	9	0.074	1	n/d	9	n/d	9	1.875	1	n/d
Iceland 3	Hopwood et al., Nat. Commun., 2019	Jökulsárlón	Iceland	9	2016	16.8872	2	92528.3	2	n/d	9	n/d	9	0.033	1	n/d	9	n/d	9	0.29	1	n/d
Iceland 4	Hopwood et al., Nat. Commun., 2019	Jökulsárlón	Iceland	9	2016	30.4915	2	6155.96	2	n/d	9	n/d	9	0.022	1	n/d	9	n/d	9	0.304	1	n/d
Iceland 5	Hopwood et al., Nat. Commun., 2019	Jökulsárlón	Iceland	9	2016	38.5187	2	7305.8	2	n/d	9	n/d	9	0.036	1	n/d	9	n/d	9	1.256	1	n/d
Iceland 6	Hopwood et al., Nat. Commun., 2019	Jökulsárlón	Iceland	9	2016	190.815	2	67594	2	n/d	9	n/d	9	1.883	1	n/d	9	n/d	9	2.504	1	n/d
Iceland 7	Hopwood et al., Nat. Commun., 2019	Jökulsárlón	Iceland	9	2016	n/d	9	173849	2	n/d	9	n/d	9	n/d	9	n/d	9	n/d	9	n/d	9	n/d
Iceland 8	Hopwood et al., Nat. Commun., 2019	Jökulsárlón	Iceland	9	2016	48.4255	2	1.93134e+06	2	n/d	9	n/d	9	0.209	1	n/d	9	n/d	9	1.745	1	n/d
Iceland 9	Hopwood et al., Nat. Commun., 2019	Jökulsárlón	Iceland	9	2016	106.934	2	229298	2	n/d	9	n/d	9	0.228	1	n/d	9	n/d	9	0.905	1	n/d
PS100 ICE	Hopwood et al., Nat. Commun., 2019	79° North	Greenland	8	2016	n/d	9	36.32	2	n/d	9	n/d	9	0.049	1	n/d	9	n/d	9	0.38	1	n/d
PIA 1	Hopwood et al., Nat. Commun., 2019	PIA	Patagonia	7	2017	n/d	9	267.066	2	n/d	9	n/d	9	<LOD	6	1.05	1	n/d	9	<LOD	6	n/d
PIA 2	Hopwood et al., Nat. Commun., 2019	PIA	Patagonia	7	2017	n/d	9	205.442	2	n/d	9	n/d	9	0.11	1	1.05	1	n/d	9	0.49	1	n/d
PIA 3	Hopwood et al., Nat. Commun., 2019	PIA	Patagonia	7	2017	n/d	9	167.056	2	n/d	9	n/d	9	0.2	1	0.28	1	n/d	9	0	1	n/d
PIA 4	Hopwood et al., Nat. Commun., 2019	PIA	Patagonia	7	2017	n/d	9	202.04	2	n/d	9	n/d	9	0.09	1	1.34	1	n/d	9	0.18	1	n/d
PIA 5	Hopwood et al., Nat. Commun., 2019	PIA	Patagonia	7	2017	n/d	9	727.104	2	n/d	9	n/d	9	0.34	1	1.56	1	n/d	9	<LOD	6	n/d
PIA 6	Hopwood et al., Nat. Commun., 2019	PIA	Patagonia	7	2017	n/d	9	352.775	2	n/d	9	n/d	9	0.36	1	1.36	1	n/d	9	0.29	1	n/d
PIA 7	Hopwood et al., Nat. Commun., 2019	PIA	Patagonia	7	2017	n/d	9	369.258	2	n/d	9	n/d	9	0.42	1	2.3	1	n/d	9	0.37	1	n/d
	Hopwood et al., Nat. Commun., 2019	Kongsfjorden	Svalbard	8	2016	n/d	9	1322.51	2	n/d	9	n/d	9	0.097	1	n/d	9	n/d	9	6.264	1	n/d
	Hopwood et al., Nat. Commun., 2019	Kongsfjorden	Svalbard	8	2016	n/d	9	3821.97	2	n/d	9	n/d	9	0.126	1	n/d	9	n/d	9	13.334	1	n/d
	Hopwood et al., Nat. Commun., 2019	Kongsfjorden	Svalbard	8	2016	n/d	9	102.603	2	n/d	9	n/d	9	<LOD	6	n/d	9	n/d	9	0.524	1	n/d
	Hopwood et al., Nat. Commun., 2019	Kongsfjorden	Svalbard	8	2016	n/d	9	242.608	2	n/d	9	n/d	9	0.047	1	n/d	9	n/d	9	0.836	1	n/d
	Hopwood et al., Nat. Commun., 2019	Kongsfjorden	Svalbard	8	2016	n/d	9	1154.48	2	n/d	9	n/d	9	0.092	1	n/d	9	n/d	9	4.383	1	n/d
	Hopwood et al., Nat. Commun., 2019	Kongsfjorden	Svalbard	8	2016	n/d	9	2701.31	2	n/d	9	n/d	9	0.202	1	n/d	9	n/d	9	8.335	1	n/d
	Hopwood et al., Nat. Commun., 2019	Kongsfjorden	Svalbard	8	2016	n/d	9	103.244	2	n/d	9	n/d	9	0.071	1	n/d	9	n/d	9	0.368	1	n/d
	Hopwood et al., Nat. Commun., 2019	Kongsfjorden	Svalbard	8	2016	n/d	9	108.868	2	n/d	9	n/d	9	0.033	1	n/d	9	n/d	9	0.415	1	n/d
	Hopwood et al., Nat. Commun., 2019	Kongsfjorden	Svalbard	8	2016	n/d	9	198.615	2	n/d	9	n/d	9	0.042	1	n/d	9	n/d	9	0.802	1	n/d
	Hopwood et al., Nat. Commun., 2019	Kongsfjorden	Svalbard	8	2016	n/d	9	154.765	2	n/d	9	n/d	9	0.022	1	n/d	9	n/d	9	0.978	1	n/d
	Hopwood et al., Nat. Commun., 2019	Kongsfjorden	Svalbard	8	2016	n/d	9	85.0408	2	n/d	9	n/d	9	<LOD	6	n/d	9	n/d	9	0.535	1	n/d
	Hopwood et al., Nat. Commun., 2019	Kongsfjorden	Svalbard	8	2016	n/d	9	38.7558	2	n/d	9	n/d	9	0.026	1	n/d	9	n/d	9	0.197	1	n/d
	Hopwood et al., Nat. Commun., 2019	Kongsfjorden	Svalbard	8	2016	n/d	9	273.239	2	n/d	9	n/d	9	0.052	1	n/d	9	n/d	9	1.152	1	n/d
	Hopwood et al., Nat. Commun., 2019	Kongsfjorden	Svalbard	8	2016	n/d	9	46.1063	2	n/d	9	n/d	9	0.021	1	n/d	9	n/d	9	0.249	1	n/d
	Hopwood et al., Nat. Commun., 2019	Kongsfjorden	Svalbard	8	2016	n/d	9	393.218	2	n/d	9	n/d	9	0.101	1	n/d	9	n/d	9	1.8	1	n/d
	Hopwood et al., Nat. Commun., 2019	Kongsfjorden	Svalbard	8	2016	n/d	9	197.518	2	n/d	9	n/d	9	<LOD	6	n/d	9	n/d	9	<LOD	6	n/d
	Hopwood et al., Nat. Commun., 2019	Kongsfjorden	Svalbard	8	2016	n/d	9	26.0983	2	n/d	9	n/d	9	0.031	1	n/d	9	n/d	9	0.746	1	n/d
	Hopwood et al., Nat. Commun., 2019	Kongsfjorden	Svalbard	8	2016	n/d	9	192.058	2	n/d	9	n/d	9	0.069	1	n/d	9	n/d	9	0.653	1	n/d
	Hopwood et al., Nat. Commun., 2019	Kongsfjorden	Svalbard	8	2016	n/d	9	3763.24	2	n/d	9	n/d	9	0.432	1	n/d	9	n/d	9	20.993	1	n/d
	Hopwood et al., Nat. Commun., 2019	Kongsfjorden	Svalbard	8	2016	n/d	9	137.418	2	n/d	9	n/d	9	0.058	1	n/d	9	n/d	9	0.568	1	n/d
	Hopwood et al., Nat. Commun., 2019	Fildes	Western Antarctic Peninsula	1	2018	74.5162	2	1243.84	2	n/d	9	n/d	9	0.131	1	1.4	1	1.4	1	0.176	1	3.52174
	Hopwood et al., Nat. Commun., 2019	Fildes	Western Antarctic Peninsula	1	2018	221.738	2	804.364	2	n/d	9	n/d	9	0.062	1	1.11	1	1.1	1	2.623	1	4.26087
	Hopwood et al., Nat. Commun., 2019	Fildes	Western Antarctic Peninsula	1	2018	52.3422	2	1345.27	2	n/d	9	n/d	9	0.091	1	1.2	1	1.2	1	0.102	1	1.40645
	Hopwood et al., Nat. Commun., 2019	Fildes	Western Antarctic Peninsula	1	2018	22.61	2	1205.13	2	n/d	9	n/d	9	0.044	1	1.5	1	1.5	1	<LOD	6	2.23853
	Hopwood et al., Nat. Commun., 2019	Fildes	Western Antarctic Peninsula	1	2018	25.634	2	666.795	2	n/d	9	n/d	9	0.057	1	0.86	1	0.85	1	<LOD	6	6.63158
	Hopwood et al., Nat. Commun., 2019	Fildes	Western Antarctic Peninsula	1	2018	83.4613	2	4533.9	2	n/d	9	n/d	9	0.349	1	1.26	1	1.25	1	0.149	1	4.96552
	Hopwood et al., Nat. Commun., 2019	Fildes	Western Antarctic Peninsula	1	2018	47.4622	2	587.382	2	n/d	9	n/d	9	0.176	1	0.87	1	0.8	1	0.099	1	8.11765
	Hopwood et al., Nat. Commun., 2019	Fildes	Western Antarctic Peninsula	1	2018	105.396	2	3537.14	2	n/d	9	n/d	9	0.183	1	1.11	1	1.1	1	0.305	1	27.9348
	Hopwood et al., Nat. Commun., 2019	Fildes	Western Antarctic Peninsula	1	2018	30.2123	2	547.474	2	n/d	9	n/d	9	0.072	1	1.22	1	1.2	1	<LOD	6	3.63395
	Hopwood et al., Nat. Commun., 2019	Fildes	Western Antarctic Peninsula	1	2018	4.18079	2	185.63	2	n/d	9	n/d	9	0.021	1	0.85	1	0.85	1	<LOD	6	1.2349
	Hopwood et al., Nat. Commun., 2019	Fildes	Western Antarctic Peninsula	1	2018	544.215	2	16.1434	2	n/d	9	n/d	9	0.037	1	0.75	1	0.75	1	<LOD	6	8.47059
	Hopwood et al., Nat. Commun., 2019	Fildes	Western Antarctic Peninsula	1	2018	33.5344	2	7708.97	2	n/d	9	n/d	9	0.04	1	1.45	1	1.3	1	0.153	1	8.97778
	Hopwood et al., Nat. Commun., 2019	Fildes	Western Antarctic Peninsula	1	2018	19.363	2	1329.85	2	n/d	9	n/d	9	0.091	1	1.9	1	1.9	1	0.095	1	3.92045
	Hopwood et al., Nat. Commun., 2019	Fildes	Western Antarctic Peninsula	1	2018	577.395	2	1.08277e+06	2	n/d	9	n/d	9	0.232	1	1.25	1	0.85	1	4.515	1	2042.75
	Hopwood et al., Nat. Commun., 2019	Fildes	Western Antarctic Peninsula	1	2018	49.4171	2	52040.5	2	n/d	9	n/d	9	0.025	1	1.34	1	1.15	1	0.399	1	53.831
	Hopwood et al., Nat. Commun., 2019	Fildes	Western Antarctic Peninsula	1	2018	5.32852	2	4012.3	2	n/d	9	n/d	9	0.031	1	0.81	1	0.8	1	<LOD	6	2.06452
	Hopwood et al., Nat. Commun., 2019	Fildes	Western Antarctic Peninsula	1	2018	3.92246	2	1576.24	2	n/d	9	n/d	9	<LOD	6	1.66	1	1.6	1	<LOD	6	8.46512
	Hopwood et al., Nat. Commun., 2019	Fildes	Western Antarctic Peninsula	1	2018	6.50364	2	244.11	2	n/d	9	n/d	9	0.038	1	0.99	1	0.95	1	<LOD	6	5.58772
	Hopwood et al., Nat. Commun., 2019	Fildes	Western Antarctic Peninsula	1	2018	19.235	2	623.469	2	n/d	9	n/d	9	0.039	1	1.45	1	1.45	1	<LOD	6	4.29442
	Hopwood et al., Nat. Commun., 2019	Yelcho	Western Antarctic Peninsula	2	2018	56.293	2	151732	2	n/d	9	n/d	9	0.165	1	5.24	1	3.3	1	15.421	1	448.847
	Hopwood et al., Nat. Commun., 2019	Yelcho	Western Antarctic Peninsula	2	2018	2.98655	2	55.4012	2	n/d	9	n/d	9	<LOD	6	1.1	1	1.1	1	<LOD	6	3.46512
	Hopwood et al., Nat. Commun., 2019	Yelcho	Western Antarctic Peninsula	2	2018	4.28177	2	67.2965	2	n/d	9	n/d	9	0.039	1	0.9	1	0.9	1	<LOD	6	0.870968
	Hopwood et al., Nat. Commun., 2019	Yelcho	Western Antarctic Peninsula	2	2018	3.27338	2	5.86517	2	n/d	9	n/d	9	<LOD	6	0.87	1	0.85	1	<LOD	6	0.994186
	Hopwood et al., Nat. Commun., 2019	Yelcho	Western Antarctic Peninsula	2	2018	3.99091	2	48.2439	2	n/d	9	n/d	9	<LOD	6	1.1	1	1.1	1	<LOD	6	2.36842
	Hopwood et al., Nat. Commun., 2019	Yelcho	Western Antarctic Peninsula	2	2018	40.8319	2	110.525	2	n/d	9	n/d	9	<LOD	6	1.05	1	1.05	1	0.281	1	0.689189
	Hopwood et al., Nat. Commun., 2019	Yelcho	Western Antarctic Peninsula	2	2018	9.12319	2	380.478	2	n/d	9	n/d	9	<LOD	6	0.84	1	0.8	1	<LOD	6	4.82222
	Hopwood et al., Nat. Commun., 2019	Yelcho	Western Antarctic Peninsula	2	2018	188.393	2	11736.4	2	n/d	9	n/d	9	0.044	1	1.18	1	1	1	0.699	1	9.69333
	Hopwood et al., Nat. Commun., 2019	Yelcho	Western Antarctic Peninsula	2	2018	47.0199	2	1753.71	2	n/d	9	n/d	9	0.047	1	1.32	1	1.15	1	0.3	1	2.46538
	Hopwood et al., Nat. Commun., 2019	Yelcho	Western Antarctic Peninsula	2	2018	68.3713	2	1520.62	2	n/d	9	n/d	9	0.057	1	1.1	1	1	1	0.427	1	3.02899
	Hopwood et al., Nat. Commun., 2019	Yelcho	Western Antarctic Peninsula	2	2018	10.9721	2	73.5977	2	n/d	9	n/d	9	0.218	1	0.9	1	0.9	1	<LOD	6	1.59184
	Hopwood et al., Nat. Commun., 2019	Yelcho	Western Antarctic Peninsula	2	2018	13.4667	2	231.94	2	n/d	9	n/d	9	0.024	1	0.9	1	0.9	1	<LOD	6	2.42857
	Hopwood et al., Nat. Commun., 2019	Yelcho	Western Antarctic Peninsula	2	2018	70.8212	2	1444.72	2	n/d	9	n/d	9	0.11	1	1	1	1	1	<LOD	6	11.7241
	Hopwood et al., Nat. Commun., 2019	Yelcho	Western Antarctic Peninsula	2	2018	21.7238	2	836.908	2	n/d	9	n/d	9	0.092	1	1.43	1	1.4	1	2.066	1	10.4678
	Hopwood et al., Nat. Commun., 2019	Yelcho	Western Antarctic Peninsula	2	2018	39.1972	2	651.302	2	n/d	9	n/d	9	0.023	1	0.7	1	0.7	1	<LOD	6	3.38272
	Hopwood et al., Nat. Commun., 2019	Yelcho	Western Antarctic Peninsula	2	2018	5.87418	2	47.0881	2	n/d	9	n/d	9	<LOD	6	0.81	1	0.8	1	<LOD	6	2.00901
	Hopwood et al., Nat. Commun., 2019	Yelcho	Western Antarctic Peninsula	2	2018	2.60775	2	88.3266	2	n/d	9	n/d	9	<LOD	6	2.02	1	2	1	<LOD	6	1.64815
	Hopwood et al., Nat. Commun., 2019	Yelcho	Western Antarctic Peninsula	2	2018	232.992	2	13083.2	2	n/d	9	n/d	9	0.084	1	1.87	1	1.8	1	0.503	1	151.794
	Hopwood et al., Nat. Commun., 2019	Yelcho	Western Antarctic Peninsula	2	2018	2.3214	2	29.6347	2	n/d	9	n/d	9	<LOD	6	1.1	1	1.1	1	<LOD	6	1.58407
Literature	Campbell, J. A. and Yeats, Oceanol. Acta, 5(2) (1982)	Baffin Bay, Bylot Island	Canadian Arctic	n/d	n/d	11.2812	0	292.237	2	n/d	9	n/d	9	n/d	9	n/d	9	n/d	9	n/d	9	n/d
Literature	Loscher, B. M. et al. Deep. Res. Part Ii-Topical Stud. Oceanogr., 44(1–2), 143–187 (1997)	South Atlantic, Polar Front	Drake Passage	n/d	n/d	n/d	9	26.3	2	n/d	9	n/d	9	n/d	9	n/d	9	n/d	9	n/d	9	n/d
Literature	Loscher, B. M. et al. Deep. Res. Part Ii-Topical Stud. Oceanogr., 44(1–2), 143–187 (1997)	South Atlantic, Polar Front	South Atlantic, Polar Front	n/d	n/d	n/d	9	10.8	2	n/d	9	n/d	9	n/d	9	n/d	9	n/d	9	n/d	9	n/d
Literature	Lin et al., Deep Sea Research 2011	Antarctic Peninsular	Western Antarctic Peninsula	n/d	n/d	3.83	0	n/d	9	n/d	9	n/d	9	n/d	9	n/d	9	n/d	9	n/d	9	n/d
Literature	Lin et al., Deep Sea Research 2011	Antarctic Peninsular	Western Antarctic Peninsula	n/d	n/d	4.01	0	n/d	9	n/d	9	n/d	9	n/d	9	n/d	9	n/d	9	n/d	9	n/d
Literature	Lin et al., Deep Sea Research 2011	Antarctic Peninsular	Western Antarctic Peninsula	n/d	n/d	17.1	0	n/d	9	n/d	9	n/d	9	n/d	9	n/d	9	n/d	9	n/d	9	n/d
Literature	Lin et al., Deep Sea Research 2011	Antarctic Peninsular	Western Antarctic Peninsula	n/d	n/d	28.8	0	n/d	9	n/d	9	n/d	9	n/d	9	n/d	9	n/d	9	n/d	9	n/d
Literature	Lin et al., Deep Sea Research 2011	Antarctic Peninsular	Western Antarctic Peninsula	n/d	n/d	607	0	n/d	9	n/d	9	n/d	9	n/d	9	n/d	9	n/d	9	n/d	9	n/d
Literature	Martin, J. H., Gordon, R. M. and Fitzwater, Nature, 345, 156–158 (1990)	Drake Passage	Drake Passage	n/d	n/d	n/d	9	25.9	0	n/d	9	n/d	9	n/d	9	n/d	9	n/d	9	n/d	9	n/d
Literature	De Baar, H. J. W. et al. Nature, 373, 412–415, (1995)	South Atlantic, Polar Front	Drake Passage	n/d	n/d	n/d	9	20.4	0	n/d	9	n/d	9	n/d	9	n/d	9	n/d	9	n/d	9	n/d
Literature	Forsch et al., Biogeosciences, 2021	Andvord Bay	Western Antarctic Peninsula	12	2015	211.59	0	122228	0	n/d	9	n/d	9	n/d	9	n/d	9	n/d	9	n/d	9	n/d
Literature	Forsch et al., Biogeosciences, 2021	Andvord Bay	Western Antarctic Peninsula	12	2015	n/d	9	994.26	0	n/d	9	n/d	9	n/d	9	n/d	9	n/d	9	n/d	9	n/d
Literature	Forsch et al., Biogeosciences, 2021	Andvord Bay	Western Antarctic Peninsula	12	2015	1.43	0	n/d	9	n/d	9	n/d	9	n/d	9	n/d	9	n/d	9	n/d	9	n/d
Literature	Forsch et al., Biogeosciences, 2021	Andvord Bay	Western Antarctic Peninsula	12	2015	1.52	0	n/d	9	n/d	9	n/d	9	n/d	9	n/d	9	n/d	9	n/d	9	n/d
Ice 1	n/a	Illussiat	Greenland	8	2019	n/d	9	n/d	9	n/d	9	n/d	9	<LOD	6	2.003	1	2.001	1	2.009	1	n/d
Ice 2	n/a	Illussiat	Greenland	8	2019	n/d	9	n/d	9	n/d	9	n/d	9	<LOD	6	1.31	1	1.311	1	1.319	1	n/d
Ice 3	n/a	Illussiat	Greenland	8	2019	n/d	9	n/d	9	n/d	9	n/d	9	<LOD	6	1.328	1	1.333	1	1.341	1	n/d
Ice 4	n/a	Illussiat	Greenland	8	2019	n/d	9	n/d	9	n/d	9	n/d	9	<LOD	6	0.172	1	0.176	1	<LOD	6	n/d
Ice 5	n/a	Illussiat	Greenland	8	2019	n/d	9	n/d	9	n/d	9	n/d	9	<LOD	6	0.1	1	0.106	1	<LOD	6	n/d
Ice 6	n/a	Illussiat	Greenland	8	2019	n/d	9	n/d	9	n/d	9	n/d	9	<LOD	6	0.961	1	0.966	1	0.974	1	n/d
Ice 7	n/a	Illussiat	Greenland	8	2019	n/d	9	n/d	9	n/d	9	n/d	9	<LOD	6	1.319	1	1.325	1	1.333	1	n/d
Ice 8	n/a	Illussiat	Greenland	8	2019	n/d	9	n/d	9	n/d	9	n/d	9	<LOD	6	0.432	1	0.428	1	0.436	1	n/d
Ice 9	n/a	Illussiat	Greenland	8	2019	n/d	9	n/d	9	n/d	9	n/d	9	<LOD	6	2.055	1	2.043	1	2.051	1	n/d
Ice 10	n/a	Illussiat	Greenland	8	2019	n/d	9	n/d	9	n/d	9	n/d	9	<LOD	6	0.513	1	0.52	1	0.528	1	n/d
MG2018_Icefloat 2	n/a	Godthabsfjord	Greenland	8	2018	27.9924	2	27.956	2	n/d	9	n/d	9	<LOD	6	1.19	1	1.19	1	0.32	1	n/d
MG2018_Icefloat 3	n/a	Godthabsfjord	Greenland	8	2018	17.144	2	187.259	2	n/d	9	n/d	9	0.02	1	1.32	1	1.32	1	0.32	1	n/d
MG2018_Icefloat 4	n/a	Godthabsfjord	Greenland	8	2018	4.29449	2	4.66553	2	n/d	9	n/d	9	<LOD	6	0.28	1	0.28	1	0.21	1	n/d
MG2018_Icefloat 5	n/a	Godthabsfjord	Greenland	8	2018	1.26631	2	5.91426	2	n/d	9	n/d	9	0.09	1	0.55	1	0.55	1	0.97	1	n/d
MG2018_Icefloat 6	n/a	Godthabsfjord	Greenland	8	2018	5.07155	2	5.94224	2	n/d	9	n/d	9	<LOD	6	0.27	1	0.27	1	0.31	1	n/d
MG2018_Icefloat 7	n/a	Godthabsfjord	Greenland	8	2018	1.59279	2	10.1057	2	n/d	9	n/d	9	<LOD	6	0.16	1	0.16	1	0.22	1	n/d
MG2018_Icefloat 8	n/a	Godthabsfjord	Greenland	8	2018	18.67	2	28.4457	2	n/d	9	n/d	9	0.3	1	0.69	1	0.69	1	2.46	1	n/d
MG2018_Icefloat 9	n/a	Godthabsfjord	Greenland	8	2018	18.6305	2	86.8664	2	n/d	9	n/d	9	0.02	1	1.38	1	1.38	1	0.48	1	n/d
MG2018_Icefloat 10	n/a	Godthabsfjord	Greenland	8	2018	19.1482	2	72.0243	2	n/d	9	n/d	9	<LOD	6	1.31	1	1.31	1	0.19	1	n/d
Ice 01	n/a	Godthabsfjord	Greenland	5	2019	5.81094	2	n/d	9	n/d	9	n/d	9	0.047	1	2.382	1	2.382	1	0.147	1	n/d
Ice 02	n/a	Godthabsfjord	Greenland	5	2019	19.4745	2	n/d	9	n/d	9	n/d	9	<LOD	6	0.521	1	0.521	1	0.365	1	n/d
Ice 03	n/a	Godthabsfjord	Greenland	5	2019	3.77934	2	n/d	9	n/d	9	n/d	9	<LOD	6	0.307	1	0.307	1	0.117	1	n/d
Ice 04	n/a	Godthabsfjord	Greenland	5	2019	6.37273	2	n/d	9	n/d	9	n/d	9	<LOD	6	0.576	1	0.576	1	0.105	1	n/d
Ice 05	n/a	Godthabsfjord	Greenland	5	2019	4.79911	2	n/d	9	n/d	9	n/d	9	<LOD	6	0.108	1	0.108	1	0.102	1	n/d
Ice 06	n/a	Godthabsfjord	Greenland	5	2019	2.18888	2	n/d	9	n/d	9	n/d	9	<LOD	6	0.275	1	0.275	1	<LOD	6	n/d
Ice 07	n/a	Godthabsfjord	Greenland	5	2019	17.8235	2	n/d	9	n/d	9	n/d	9	<LOD	6	0.894	1	0.894	1	0.106	1	n/d
Ice 08	n/a	Godthabsfjord	Greenland	5	2019	3.26807	2	n/d	9	n/d	9	n/d	9	<LOD	6	0.272	1	0.272	1	2.37	1	n/d
Ice 09	n/a	Godthabsfjord	Greenland	5	2019	45.6819	2	n/d	9	n/d	9	n/d	9	0.074	1	0.099	1	0.099	1	0.228	1	n/d
Ice 10	n/a	Godthabsfjord	Greenland	5	2019	1.40986	2	n/d	9	n/d	9	n/d	9	0.227	1	<LOD	6	<LOD	6	0.074	1	n/d
Ice 11	n/a	Godthabsfjord	Greenland	5	2019	3.7099	2	n/d	9	n/d	9	n/d	9	<LOD	6	0.725	1	0.725	1	0.075	1	n/d
Ice 12	n/a	Godthabsfjord	Greenland	5	2019	4.06573	2	n/d	9	n/d	9	n/d	9	<LOD	6	<LOD	6	<LOD	6	<LOD	6	n/d
Ice 13	n/a	Godthabsfjord	Greenland	5	2019	4.32791	2	n/d	9	n/d	9	n/d	9	0.062	1	<LOD	6	<LOD	6	<LOD	6	n/d
Ice 14	n/a	Godthabsfjord	Greenland	5	2019	9.43286	2	n/d	9	n/d	9	n/d	9	<LOD	6	1.108	1	1.108	1	<LOD	6	n/d
Ice 15	n/a	Godthabsfjord	Greenland	5	2019	18.2848	2	n/d	9	n/d	9	n/d	9	<LOD	6	1.402	1	1.402	1	<LOD	6	n/d
Ice 16	n/a	Godthabsfjord	Greenland	5	2019	17.0812	2	n/d	9	n/d	9	n/d	9	<LOD	6	<LOD	6	<LOD	6	0.084	1	n/d
Ice 17	n/a	Godthabsfjord	Greenland	5	2019	3.18916	2	n/d	9	n/d	9	n/d	9	<LOD	6	0.176	1	0.176	1	0.084	1	n/d
Ice 18	n/a	Godthabsfjord	Greenland	5	2019	24.0622	2	n/d	9	n/d	9	n/d	9	0.029	1	<LOD	6	<LOD	6	0.111	1	n/d
IM_01	n/a	Godthabsfjord	Greenland	9	2019	7.10956	2	14.6196	2	n/d	9	n/d	9	<LOD	6	0.651167	1	0.6315	1	0.64	1	n/d
IM_02	n/a	Godthabsfjord	Greenland	9	2019	5.49542	2	37.355	2	n/d	9	n/d	9	<LOD	6	0.197167	1	0.1725	1	<LOD	6	n/d
IM_03	n/a	Godthabsfjord	Greenland	9	2019	4.81222	2	18.4107	2	n/d	9	n/d	9	<LOD	6	0.539167	1	0.5335	1	0.542	1	n/d
IM_04	n/a	Godthabsfjord	Greenland	9	2019	5.61482	2	39.5036	2	n/d	9	n/d	9	<LOD	6	0.856167	1	0.8395	1	0.848	1	n/d
IM_05	n/a	Godthabsfjord	Greenland	9	2019	4.18521	2	9.62344	2	n/d	9	n/d	9	<LOD	6	0.137167	1	0.1225	1	<LOD	6	n/d
IM_06	n/a	Godthabsfjord	Greenland	9	2019	6.1339	2	18.1311	2	n/d	9	n/d	9	<LOD	6	0.694167	1	0.6795	1	0.688	1	n/d
IM_07	n/a	Godthabsfjord	Greenland	9	2019	12.9541	2	62.8273	2	n/d	9	n/d	9	<LOD	6	1.20717	1	1.1905	1	1.199	1	n/d
IM_08	n/a	Godthabsfjord	Greenland	9	2019	10.8058	2	16.2217	2	n/d	9	n/d	9	<LOD	6	1.13117	1	1.1175	1	1.126	1	n/d
IM_09	n/a	Godthabsfjord	Greenland	9	2019	5.74308	2	10.8272	2	n/d	9	n/d	9	<LOD	6	0.772167	1	0.7685	1	0.777	1	n/d
IM_10	n/a	Godthabsfjord	Greenland	9	2019	6.53355	2	22.1831	2	n/d	9	n/d	9	<LOD	6	0.530167	1	0.5165	1	0.525	1	n/d
IM_11	n/a	Godthabsfjord	Greenland	9	2019	12.7388	2	52.0584	2	n/d	9	n/d	9	<LOD	6	1.48417	1	1.4705	1	1.479	1	n/d
IM_12	n/a	Godthabsfjord	Greenland	9	2019	7.13367	2	8.25256	2	n/d	9	n/d	9	<LOD	6	0.298167	1	0.2835	1	0.292	1	n/d
IM_13	n/a	Godthabsfjord	Greenland	9	2019	4.60257	2	26.3582	2	n/d	9	n/d	9	<LOD	6	0.172167	1	0.1705	1	<LOD	6	n/d
IM_14	n/a	Godthabsfjord	Greenland	9	2019	4.50887	2	79.8494	2	n/d	9	n/d	9	<LOD	6	0.158167	1	0.1495	1	<LOD	6	n/d
IM_15	n/a	Godthabsfjord	Greenland	9	2019	4.67047	2	8.68143	2	n/d	9	n/d	9	<LOD	6	0.300167	1	0.2895	1	0.298	1	n/d
IM_16	n/a	Godthabsfjord	Greenland	9	2019	6.38571	2	17.7639	2	n/d	9	n/d	9	<LOD	6	0.694167	1	0.6885	1	0.697	1	n/d
IM_17	n/a	Godthabsfjord	Greenland	9	2019	3.79086	2	4.81694	2	n/d	9	n/d	9	<LOD	6	1.00517	1	1.0085	1	1.017	1	n/d
IM_18	n/a	Godthabsfjord	Greenland	9	2019	6.03491	2	11.6479	2	n/d	9	n/d	9	<LOD	6	0.634167	1	0.6315	1	0.64	1	n/d
IM_19	n/a	Godthabsfjord	Greenland	9	2019	3.50906	2	28.5559	2	n/d	9	n/d	9	<LOD	6	<LOD	6	<LOD	6	<LOD	6	n/d
IM_20	n/a	Godthabsfjord	Greenland	9	2019	7.72787	2	28.3807	2	n/d	9	n/d	9	<LOD	6	1.03317	1	1.0265	1	1.035	1	n/d
IM_21	n/a	Godthabsfjord	Greenland	9	2019	7.34918	2	170.988	2	n/d	9	n/d	9	<LOD	6	0.228167	1	0.2225	1	<LOD	6	n/d
IM_22	n/a	Godthabsfjord	Greenland	9	2019	6.80891	2	27.5396	2	n/d	9	n/d	9	<LOD	6	0.808167	1	0.8095	1	0.818	1	n/d
IM_01	n/a	Eqip Glacier	Greenland	7	2019	8.98886	2	n/d	9	n/d	9	n/d	9	0.04675	1	<LOD	6	0.10925	1	<LOD	6	n/d
IM_02	n/a	Eqip Glacier	Greenland	7	2019	5.64674	2	n/d	9	n/d	9	n/d	9	<LOD	6	<LOD	6	0.72625	1	<LOD	6	n/d
IM_03	n/a	Eqip Glacier	Greenland	7	2019	6.74003	2	n/d	9	n/d	9	n/d	9	<LOD	6	<LOD	6	0.44325	1	<LOD	6	n/d
IM_04	n/a	Eqip Glacier	Greenland	7	2019	6.05642	2	n/d	9	n/d	9	n/d	9	<LOD	6	<LOD	6	1.08625	1	<LOD	6	n/d
IM_05	n/a	Eqip Glacier	Greenland	7	2019	7.83215	2	n/d	9	n/d	9	n/d	9	<LOD	6	<LOD	6	0.18225	1	<LOD	6	n/d
IM_06	n/a	Eqip Glacier	Greenland	7	2019	10.249	2	n/d	9	n/d	9	n/d	9	<LOD	6	<LOD	6	0.46625	1	<LOD	6	n/d
IM_07	n/a	Eqip Glacier	Greenland	7	2019	11.2021	2	n/d	9	n/d	9	n/d	9	0.10075	1	<LOD	6	0.73525	1	<LOD	6	n/d
IM_08	n/a	Eqip Glacier	Greenland	7	2019	6.46333	2	n/d	9	n/d	9	n/d	9	<LOD	6	<LOD	6	<LOD	6	<LOD	6	n/d
IM_09	n/a	Eqip Glacier	Greenland	7	2019	10.2148	2	n/d	9	n/d	9	n/d	9	0.12275	1	<LOD	6	0.19425	1	<LOD	6	n/d
IM_10	n/a	Eqip Glacier	Greenland	7	2019	11.5273	2	n/d	9	n/d	9	n/d	9	<LOD	6	<LOD	6	0.48825	1	<LOD	6	n/d
IM_11	n/a	Eqip Glacier	Greenland	7	2019	6.44764	2	n/d	9	n/d	9	n/d	9	<LOD	6	<LOD	6	0.37625	1	<LOD	6	n/d
IM_12	n/a	Eqip Glacier	Greenland	7	2019	6.4024	2	n/d	9	n/d	9	n/d	9	<LOD	6	<LOD	6	1.08025	1	<LOD	6	n/d
IM_13	n/a	Eqip Glacier	Greenland	7	2019	6.36366	2	n/d	9	n/d	9	n/d	9	<LOD	6	<LOD	6	0.31925	1	<LOD	6	n/d
IM_14	n/a	Eqip Glacier	Greenland	7	2019	7.69807	2	n/d	9	n/d	9	n/d	9	<LOD	6	<LOD	6	0.25325	1	<LOD	6	n/d
IM_15	n/a	Eqip Glacier	Greenland	7	2019	4.85844	2	n/d	9	n/d	9	n/d	9	<LOD	6	<LOD	6	0.12625	1	<LOD	6	n/d
Fildes Ice 1	n/a	Collins Glacier	Western Antarctic Peninsula	1	2020	4.16568	2	31.0494	2	0.657874	2	2.02999	2	0.043	1	0.0554882	1	0.0545667	1	<LOD	6	n/d
Fildes Ice 2	n/a	Collins Glacier	Western Antarctic Peninsula	1	2020	4.30229	2	41.7255	2	0.612975	2	2.03487	2	0.04	1	0.141904	1	0.133406	1	<LOD	6	n/d
Fildes Ice 3	n/a	Collins Glacier	Western Antarctic Peninsula	1	2020	2.21464	2	10.4227	2	0.0502674	2	0.215352	2	0.037	1	0.0272893	1	<LOD	6	<LOD	6	n/d
Fildes Ice 4	n/a	Collins Glacier	Western Antarctic Peninsula	1	2020	2.45845	2	67.0837	2	1.40602	2	3.49764	2	0.035	1	0.0227411	1	<LOD	6	<LOD	6	n/d
Fildes Ice 5	n/a	Collins Glacier	Western Antarctic Peninsula	1	2020	6.20035	2	266.31	2	1.17594	2	5.41224	2	0.04	1	0.0809582	1	0.0761459	1	<LOD	6	n/d
Fildes Ice 6	n/a	Collins Glacier	Western Antarctic Peninsula	1	2020	1.54668	2	20.0883	2	0.150477	2	0.594858	2	0.036	1	0.104609	1	0.0995918	1	<LOD	6	n/d
Fildes Ice 7	n/a	Collins Glacier	Western Antarctic Peninsula	1	2020	3.48842	2	52.6715	2	0.290405	2	1.19947	2	0.037	1	0.0291086	1	<LOD	6	<LOD	6	n/d
Fildes Ice 8	n/a	Collins Glacier	Western Antarctic Peninsula	1	2020	4.10643	2	22.5412	2	0.227475	2	0.197473	2	0.037	1	3.16283	1	3.16252	1	<LOD	6	n/d
Fildes Ice 9	n/a	Collins Glacier	Western Antarctic Peninsula	1	2020	1.08114	2	18.0986	2	0.0514355	2	0.0528221	2	0.038	1	0.0673135	1	0.066392	1	<LOD	6	n/d
Fildes Ice 10	n/a	Collins Glacier	Western Antarctic Peninsula	1	2020	2.96322	2	42.3837	2	0.193039	2	0.648493	2	0.036	1	0.148272	1	0.14776	1	<LOD	6	n/d
Fildes Ice 11	n/a	Collins Glacier	Western Antarctic Peninsula	1	2020	1.46778	2	48.0442	2	0.22778	2	0.57698	2	0.036	1	0.0709521	1	0.0702354	1	<LOD	6	n/d
Fildes Ice 12	n/a	Collins Glacier	Western Antarctic Peninsula	1	2020	3.60923	2	42.5996	2	0.168508	2	0.64443	2	0.037	1	0.0291086	1	<LOD	6	<LOD	6	n/d
Fildes Ice 13	n/a	Collins Glacier	Western Antarctic Peninsula	1	2020	1.29879	2	29.3012	2	0.400635	2	n/d	9	0.035	1	0.0491207	1	<LOD	6	<LOD	6	n/d
Fildes Ice 14	n/a	Collins Glacier	Western Antarctic Peninsula	1	2020	0.324571	2	11.2277	2	0.0796395	2	n/d	9	0.035	1	0.0318375	1	<LOD	6	<LOD	6	n/d
Fildes Ice 15	n/a	Collins Glacier	Western Antarctic Peninsula	1	2020	1.29843	2	32.8498	2	0.16578	2	n/d	9	0.037	1	0.0563978	1	<LOD	6	<LOD	6	n/d
Fildes Ice 16	n/a	Collins Glacier	Western Antarctic Peninsula	1	2020	1.86506	2	97.4157	2	1.44326	2	n/d	9	0.037	1	0.0463918	1	<LOD	6	<LOD	6	n/d
Fildes Ice 17	n/a	Collins Glacier	Western Antarctic Peninsula	1	2020	1.921	2	66.8403	2	0.77039	2	n/d	9	0.037	1	0.17829	1	0.173478	1	<LOD	6	n/d
Fildes Ice 18	n/a	Collins Glacier	Western Antarctic Peninsula	1	2020	6.31027	2	54.1299	2	0.589982	2	n/d	9	0.038	1	0.038205	1	<LOD	6	<LOD	6	n/d
Fildes Ice 1	n/a	Nelson Island	Western Antarctic Peninsula	1	2020	7.61684	2	1224.83	2	0.657874	2	n/d	9	0.03	1	0.0454821	1	<LOD	6	<LOD	6	n/d
Fildes Ice 2	n/a	Nelson Island	Western Antarctic Peninsula	1	2020	17.9746	2	1811.09	2	14.8045	2	65.5409	2	0.088	1	0.161007	1	0.154761	1	<LOD	6	n/d
Fildes Ice 3	n/a	Nelson Island	Western Antarctic Peninsula	1	2020	1.9822	2	218	2	1.07993	2	5.00997	2	0.044	1	0.0391146	1	<LOD	6	<LOD	6	n/d
Fildes Ice 4	n/a	Nelson Island	Western Antarctic Peninsula	1	2020	16.5177	2	674.71	2	1.57824	2	12.3214	2	0.035	1	0.0391146	1	<LOD	6	<LOD	6	n/d
Fildes Ice 5	n/a	Nelson Island	Western Antarctic Peninsula	1	2020	5.52271	2	6.09636	2	2.63956	2	6.19725	2	0.039	1	0.0800485	1	0.0760553	1	<LOD	6	n/d
Fildes Ice 6	n/a	Nelson Island	Western Antarctic Peninsula	1	2020	9.3542	2	334.154	2	2.49501	2	11.8062	2	0.044	1	0.0563978	1	0.0536333	1	<LOD	6	n/d
Fildes Ice 7	n/a	Nelson Island	Western Antarctic Peninsula	1	2020	27.6533	2	499.54	2	7.6025	2	20.3268	2	0.137	1	0.0518496	1	<LOD	6	<LOD	6	n/d
Fildes Ice 8	n/a	Nelson Island	Western Antarctic Peninsula	1	2020	57.1617	2	6569.98	2	3.82384	2	190.526	2	0.059	1	0.378411	1	0.377899	1	<LOD	6	n/d
Fildes Ice 9	n/a	Nelson Island	Western Antarctic Peninsula	1	2020	36.6697	2	835.701	2	1.44979	2	16.7934	2	0.065	1	0.0582171	1	0.055043	1	<LOD	6	n/d
Fildes Ice 10	n/a	Nelson Island	Western Antarctic Peninsula	1	2020	23.4444	2	270.185	2	1.06327	2	5.35291	2	0.043	1	0.0500303	1	<LOD	6	<LOD	6	n/d
Fildes Ice 11	n/a	Nelson Island	Western Antarctic Peninsula	1	2020	18.7609	2	690.955	2	3.52793	2	16.9388	2	0.046	1	0.221953	1	0.210792	1	<LOD	6	n/d
Fildes Ice 12	n/a	Nelson Island	Western Antarctic Peninsula	1	2020	18.9909	2	692.98	2	1.96841	2	12.1141	2	0.051	1	0.0436628	1	<LOD	6	<LOD	6	n/d
Fildes Ice 13	n/a	Nelson Island	Western Antarctic Peninsula	1	2020	9.74959	2	255.799	2	0.977438	2	5.77305	2	0.044	1	0.0391146	1	<LOD	6	<LOD	6	n/d
Fildes Ice 14	n/a	Nelson Island	Western Antarctic Peninsula	1	2020	16.5398	2	873.885	2	2.66866	2	25.4895	2	0.056	1	1.24075	1	1.24044	1	<LOD	6	n/d
Fildes Ice 15	n/a	Nelson Island	Western Antarctic Peninsula	1	2020	12.7967	2	1875.35	2	2.13698	2	29.7998	2	0.051	1	0.0955124	1	0.0882428	1	<LOD	6	n/d
Fildes Ice 16	n/a	Nelson Island	Western Antarctic Peninsula	1	2020	8.51825	2	388.323	2	1.20919	2	6.23789	2	0.042	1	0.0418435	1	<LOD	6	<LOD	6	n/d
Fildes Ice 17	n/a	Nelson Island	Western Antarctic Peninsula	1	2020	9.36704	2	2295.92	2	5.11417	2	48.2721	2	0.065	1	0.150091	1	0.137088	1	<LOD	6	n/d
Fildes Ice 18	n/a	Nelson Island	Western Antarctic Peninsula	1	2020	5.07857	2	1908.94	2	3.56293	2	52.6051	2	0.053	1	0.063675	1	0.059477	1	<LOD	6	n/d
Fildes Ice 19	n/a	Nelson Island	Western Antarctic Peninsula	1	2020	14.9002	2	1236.29	2	2.7161	2	36.9999	2	0.055	1	0.0473014	1	<LOD	6	<LOD	6	n/d
Fildes Ice 1	n/a	Marion Cove	Western Antarctic Peninsula	1	2020	2.51373	2	17.1449	2	1.05226	2	21.8814	2	0.048	1	0.261067	1	0.258712	1	<LOD	6	n/d
Fildes Ice 2	n/a	Marion Cove	Western Antarctic Peninsula	1	2020	10.9027	2	3079.1	2	2.69351	2	70.3266	2	0.072	1	0.495755	1	0.493195	1	<LOD	6	n/d
Fildes Ice 3	n/a	Marion Cove	Western Antarctic Peninsula	1	2020	13.9656	2	715.32	2	3.68971	2	26.1234	2	0.062	1	0.144633	1	0.142892	1	<LOD	6	n/d
Fildes Ice 4	n/a	Marion Cove	Western Antarctic Peninsula	1	2020	11.6789	2	317.086	2	3.48609	2	14.622	2	0.058	1	0.332019	1	0.328231	1	<LOD	6	n/d
Fildes Ice 5	n/a	Marion Cove	Western Antarctic Peninsula	1	2020	3.94946	2	107.954	2	1.0127	2	8.62788	2	0.052	1	3.98605	1	3.98411	1	<LOD	6	n/d
Fildes Ice 6	n/a	Marion Cove	Western Antarctic Peninsula	1	2020	13.1731	2	597.549	2	4.07856	2	16.4285	2	0.067	1	0.0700424	1	0.0650254	1	<LOD	6	n/d
Fildes Ice 7	n/a	Marion Cove	Western Antarctic Peninsula	1	2020	8.20549	2	516.189	2	1.76968	2	13.3656	2	0.052	1	0.05094	1	<LOD	6	<LOD	6	n/d
Fildes Ice 8	n/a	Marion Cove	Western Antarctic Peninsula	1	2020	7.02399	2	2724.55	2	0.923204	2	70.6922	2	0.047	1	0.0227411	1	<LOD	6	<LOD	6	n/d
Fildes Ice 9	n/a	Marion Cove	Western Antarctic Peninsula	1	2020	7.27975	2	698.605	2	1.82809	2	15.8596	2	0.048	1	0.182838	1	0.178845	1	<LOD	6	n/d
Fildes Ice 10	n/a	Marion Cove	Western Antarctic Peninsula	1	2020	7.04932	2	314.857	2	1.75358	2	10.7692	2	0.049	1	0.0272893	1	<LOD	6	<LOD	6	n/d
Fildes Ice 11	n/a	Marion Cove	Western Antarctic Peninsula	1	2020	12.629	2	338.201	2	3.06169	2	12.2499	2	0.06	1	0.0445725	1	<LOD	6	<LOD	6	n/d
Fildes Ice 12	n/a	Marion Cove	Western Antarctic Peninsula	1	2020	5.3953	2	224.025	2	1.45539	2	7.43573	2	0.051	1	0.855064	1	0.85148	1	<LOD	6	n/d
Fildes Ice 13	n/a	Marion Cove	Western Antarctic Peninsula	1	2020	5.72144	2	63.0445	2	0.85037	2	4.48744	2	0.048	1	0.344754	1	0.341785	1	<LOD	6	n/d
Fildes Ice 14	n/a	Marion Cove	Western Antarctic Peninsula	1	2020	5.54671	2	77.951	2	0.813395	2	4.25259	2	0.052	1	0.53487	1	0.529648	1	<LOD	6	n/d
Fildes Ice 15	n/a	Marion Cove	Western Antarctic Peninsula	1	2020	10.1675	2	480.479	2	2.84141	2	13.1397	2	0.057	1	0.370224	1	0.36746	1	<LOD	6	n/d
Fildes Ice 16	n/a	Marion Cove	Western Antarctic Peninsula	1	2020	11.5581	2	438.845	2	1.88822	2	12.5985	2	0.055	1	0.0573075	1	0.0539286	1	<LOD	6	n/d
Fildes Ice 1	n/a	Nelson Island	Western Antarctic Peninsula	1	2020	7.50758	2	861.003	2	1.42435	2	22.2698	2	0.053	1	3.72044	1	3.7189	1	0.0658278	1	n/d
Fildes Ice 2	n/a	Nelson Island	Western Antarctic Peninsula	1	2020	17.1377	2	2173.41	2	8.74641	2	59.0348	2	0.069	1	0.291086	1	0.286273	1	0.0592994	1	n/d
Fildes Ice 3	n/a	Nelson Island	Western Antarctic Peninsula	1	2020	12.6923	2	314.651	2	4.55924	2	8.8538	2	0.062	1	0.913281	1	0.911131	1	0.367221	1	n/d
Fildes Ice 4	n/a	Nelson Island	Western Antarctic Peninsula	1	2020	68.8539	2	1681.44	2	20.542	2	41.8213	2	0.07	1	0.0955124	1	0.0902906	1	0.0886771	1	n/d
Fildes Ice 5	n/a	Nelson Island	Western Antarctic Peninsula	1	2020	17.5706	2	897.89	2	4.27487	2	22.1837	2	0.076	1	0.722256	1	0.709662	1	0.0538591	1	n/d
Fildes Ice 6	n/a	Nelson Island	Western Antarctic Peninsula	1	2020	29.0269	2	344.163	2	2.47242	2	9.68433	2	0.059	1	0.140085	1	0.13343	1	<LOD	6	n/d
Fildes Ice 7	n/a	Nelson Island	Western Antarctic Peninsula	1	2020	36.5351	2	1234.37	2	7.83803	2	28.9685	2	0.058	1	0.172832	1	0.165358	1	0.0984697	1	n/d
Fildes Ice 8	n/a	Nelson Island	Western Antarctic Peninsula	1	2020	6.35904	2	1226.04	2	1.70274	2	35.3112	2	0.053	1	0.206489	1	0.19799	1	0.0592994	1	n/d
Fildes Ice 9	n/a	Nelson Island	Western Antarctic Peninsula	1	2020	14.2571	2	535.653	2	6.06574	2	15.5752	2	0.069	1	0.327471	1	0.318359	1	0.0669159	1	n/d
Fildes Ice 10	n/a	Nelson Island	Western Antarctic Peninsula	1	2020	12.5707	2	647.614	2	2.9595	2	11.4372	2	0.063	1	0.234688	1	0.229466	1	0.0505949	1	n/d
Fildes Ice 11	n/a	Nelson Island	Western Antarctic Peninsula	1	2020	19.9929	2	948.74	2	4.39712	2	22.3958	2	0.064	1	0.453002	1	0.440408	1	0.0625636	1	n/d
GSICE 1	n/a	Wilhelmina Bay	Western Antarctic Peninsula	2	2020	7.42062	2	70.7109	2	2.01474	2	5.95508	2	0.06	1	0.141904	1	0.136887	1	<LOD	6	n/d
GSICE 2	n/a	Wilhelmina Bay	Western Antarctic Peninsula	2	2020	6.52134	2	286.97	2	3.54288	2	8.88062	2	0.074	1	0.20285	1	0.199471	1	<LOD	6	n/d
GSICE 3	n/a	Wilhelmina Bay	Western Antarctic Peninsula	2	2020	10.6548	2	219.691	2	2.07036	2	6.24845	2	0.075	1	0.436628	1	0.432226	1	0.0625636	1	n/d
GSICE 4	n/a	Wilhelmina Bay	Western Antarctic Peninsula	2	2020	3.39987	2	83.2337	2	6.06549	2	8.47429	2	0.064	1	0.173742	1	0.170158	1	<LOD	6	n/d
GSICE 5	n/a	Wilhelmina Bay	Western Antarctic Peninsula	2	2020	2.78488	2	31.3913	2	0.403566	2	2.60047	2	0.055	1	0.0973317	1	0.094772	1	<LOD	6	n/d
GSICE 6	n/a	Wilhelmina Bay	Western Antarctic Peninsula	2	2020	6.47624	2	30.0333	2	0.789371	2	2.94829	2	0.051	1	0.238326	1	0.236381	1	<LOD	6	n/d
GSICE 7	n/a	Wilhelmina Bay	Western Antarctic Peninsula	2	2020	4.26707	2	198.955	2	4.72528	2	9.79241	2	0.051	1	0.30564	1	0.302875	1	<LOD	6	n/d
GSICE 8	n/a	Wilhelmina Bay	Western Antarctic Peninsula	2	2020	6.57763	2	172.052	2	0.83173	2	4.47363	2	0.054	1	0.103699	1	0.10073	1	<LOD	6	n/d
GSICE 9	n/a	Wilhelmina Bay	Western Antarctic Peninsula	2	2020	7.6211	2	117.492	2	7.71994	2	9.33164	2	0.055	1	0.35567	1	0.352086	1	<LOD	6	n/d
GSICE 10	n/a	Wilhelmina Bay	Western Antarctic Peninsula	2	2020	7.27744	2	328.807	2	1.64006	2	8.16224	2	0.059	1	0.154639	1	0.151056	1	<LOD	6	n/d
GSICE 11	n/a	Wilhelmina Bay	Western Antarctic Peninsula	2	2020	16.2826	2	513.567	2	3.91451	2	10.6782	2	0.083	1	0.260158	1	0.252888	1	<LOD	6	n/d
GSICE 12	n/a	Wilhelmina Bay	Western Antarctic Peninsula	2	2020	9.92971	2	64.6772	2	2.07681	2	3.67967	2	0.07	1	1.0852	1	1.08285	1	<LOD	6	n/d
GSICE 13	n/a	Wilhelmina Bay	Western Antarctic Peninsula	2	2020	45.0253	2	734.993	2	13.2773	2	22.2288	2	0.095	1	1.35173	1	1.34917	1	<LOD	6	n/d
GSICE 14	n/a	Wilhelmina Bay	Western Antarctic Peninsula	2	2020	292.149	2	25.0944	2	4.7911	2	3.07018	2	0.078	1	0.275622	1	0.272652	1	0.0777965	1	n/d
GSICE 15	n/a	Andvord Bay	Western Antarctic Peninsula	2	2020	13.6566	2	359.11	2	2.97529	2	1.02028	2	0.073	1	0.146452	1	0.143278	1	<LOD	6	n/d
GSICE 16	n/a	Andvord Bay	Western Antarctic Peninsula	2	2020	10.8131	2	137.972	2	3.16616	2	6.32972	2	0.061	1	0.0745907	1	0.0712118	1	<LOD	6	n/d
GSICE 17	n/a	Andvord Bay	Western Antarctic Peninsula	2	2020	7.30349	2	186.92	2	1.47205	2	7.60313	2	0.061	1	0.246513	1	0.242725	1	<LOD	6	n/d
GSICE 18	n/a	Andvord Bay	Western Antarctic Peninsula	2	2020	2.73617	2	87.699	2	0.546084	2	2.30711	2	0.052	1	0.168284	1	0.163267	1	<LOD	6	n/d
GSICE 19	n/a	Andvord Bay	Western Antarctic Peninsula	2	2020	6.14969	2	65.5561	2	4.55132	2	3.82432	2	0.056	1	0.541237	1	0.537449	1	<LOD	6	n/d
GSICE 20	n/a	Andvord Bay	Western Antarctic Peninsula	2	2020	11.2432	2	237.415	2	1.40094	2	8.50192	2	0.061	1	0.176471	1	0.173092	1	<LOD	6	n/d
GSICE 21	n/a	Andvord Bay	Western Antarctic Peninsula	2	2020	4.64719	2	418.636	2	2.539	2	9.07078	2	0.063	1	0.225591	1	0.221598	1	<LOD	6	n/d
GSICE 22	n/a	Andvord Bay	Western Antarctic Peninsula	2	2020	4.40463	2	76.6981	2	1.2634	2	3.80157	2	0.049	1	0.362947	1	0.360592	1	<LOD	6	n/d
GSICE 23	n/a	Andvord Bay	Western Antarctic Peninsula	2	2020	5.67871	2	983.7	2	3.76935	2	94.9973	2	0.064	1	0.0518496	1	<LOD	6	<LOD	6	n/d
GSICE 24	n/a	Andvord Bay	Western Antarctic Peninsula	2	2020	12.8088	2	1762.97	2	2.49187	2	29.1891	2	0.06	1	0.12826	1	0.12529	1	<LOD	6	n/d
GSICE 25	n/a	Andvord Bay	Western Antarctic Peninsula	2	2020	6.66091	2	113.474	2	2.23665	2	0.582262	2	0.056	1	0.296543	1	0.293779	1	<LOD	6	n/d
GSICE 26	n/a	Andvord Bay	Western Antarctic Peninsula	2	2020	57.4963	2	1061.8	2	28.2013	2	40.619	2	0.125	1	3.63402	1	3.62429	1	<LOD	6	n/d
GSICE 27	n/a	Flandres Bay	Western Antarctic Peninsula	2	2020	19.3958	2	242.364	2	5.8531	2	7.59423	2	0.043	1	0.252881	1	0.252573	1	<LOD	6	n/d
GSICE 28	n/a	Flandres Bay	Western Antarctic Peninsula	2	2020	15.7461	2	287.883	2	7.65555	2	10.6237	2	0.057	1	0.271073	1	0.266261	1	<LOD	6	n/d
GSICE 29	n/a	Flandres Bay	Western Antarctic Peninsula	2	2020	107.842	2	304.672	2	4.3757	2	7.51063	2	0.043	1	0.086416	1	0.0836515	1	<LOD	6	n/d
GSICE 30	n/a	Flandres Bay	Western Antarctic Peninsula	2	2020	53.1052	2	1093.85	2	42.4223	2	43.0085	2	0.124	1	0.553062	1	0.551117	1	<LOD	6	n/d
GSICE 31	n/a	Flandres Bay	Western Antarctic Peninsula	2	2020	35.468	2	206.154	2	2.47898	2	3.61601	2	0.052	1	0.157368	1	0.156037	1	<LOD	6	n/d
GSICE 32	n/a	Flandres Bay	Western Antarctic Peninsula	2	2020	29.2864	2	174.343	2	0.613956	2	5.15004	2	0.05	1	0.168284	1	0.160809	1	<LOD	6	n/d
GSICE 33	n/a	Flandres Bay	Western Antarctic Peninsula	2	2020	40.3698	2	419.259	2	12.7143	2	16.3922	2	0.068	1	0.466646	1	0.455896	1	0.0658278	1	n/d
GSICE 34	n/a	Flandres Bay	Western Antarctic Peninsula	2	2020	11.782	2	783.246	2	12.7013	2	13.4953	2	0.061	1	0.372953	1	0.365479	1	<LOD	6	n/d
GSICE 35	n/a	Flandres Bay	Western Antarctic Peninsula	2	2020	24.7559	2	174.47	2	2.11329	2	6.08865	2	0.079	1	0.549424	1	0.542564	1	0.101734	1	n/d
GSICE 36	n/a	Flandres Bay	Western Antarctic Peninsula	2	2020	11.5403	2	138.394	2	4.80966	2	11.1445	2	0.085	1	0.731352	1	0.710363	1	0.803535	1	n/d
GSICE 37	n/a	Flandres Bay	Western Antarctic Peninsula	2	2020	19.8834	2	2115.18	2	184.672	2	176.017	2	0.053	1	0.740449	1	0.725193	1	0.597891	1	n/d
GSICE 38	n/a	Flandres Bay	Western Antarctic Peninsula	2	2020	49.7579	2	37052.6	2	567.91	2	744.79	2	0.074	1	2.05761	1	2.00836	1	4.14498	1	n/d
GSICE 39	n/a	Flandres Bay	Western Antarctic Peninsula	2	2020	32.9636	2	642.586	2	61.9834	2	44.7757	2	0.043	1	0.284718	1	0.28052	1	<LOD	6	n/d
GSICE 40	n/a	Flandres Bay	Western Antarctic Peninsula	2	2020	17.4542	2	369.02	2	30.389	2	42.6254	2	0.025	1	0.154639	1	0.152284	1	<LOD	6	n/d
GSICE 41	n/a	Flandres Bay	Western Antarctic Peninsula	2	2020	182.848	2	821484	2	2342.25	2	22612.7	2	0.048	1	3.29745	1	3.2394	1	14.1834	1	n/d
Yelcho 1	n/a	Thunder Bay	Western Antarctic Peninsula	2	2020	8.93868	2	189.993	2	1.89503	2	8.78147	2	0.042	1	0.0454821	1	<LOD	6	<LOD	6	n/d
Yelcho 2	n/a	Thunder Bay	Western Antarctic Peninsula	2	2020	10.1615	2	26.3956	2	6.97139	2	9.2203	2	0.148	1	0.144633	1	0.135316	1	<LOD	6	n/d
Yelcho 3	n/a	Thunder Bay	Western Antarctic Peninsula	2	2020	8.11724	2	21.041	2	0.996647	2	3.16039	2	0.055	1	0.02547	1	<LOD	6	<LOD	6	n/d
Yelcho 4	n/a	Thunder Bay	Western Antarctic Peninsula	2	2020	7.59837	2	5191.53	2	1.91448	2	81.3932	2	0.1	1	0.274712	1	0.263756	1	<LOD	6	n/d
Yelcho 5	n/a	Thunder Bay	Western Antarctic Peninsula	2	2020	58.5818	2	320.292	2	2.96595	2	9.38202	2	0.118	1	0.114615	1	0.113898	1	0.0592994	1	n/d
Yelcho 6	n/a	Thunder Bay	Western Antarctic Peninsula	2	2020	1.98368	2	74.0814	2	0.186843	2	3.18802	2	0.049	1	0.0218314	1	<LOD	6	<LOD	6	n/d
Yelcho 7	n/a	Thunder Bay	Western Antarctic Peninsula	2	2020	11.3153	2	37.6295	2	6.22847	2	7.38209	2	0.139	1	0.15282	1	0.140431	1	<LOD	6	n/d
Yelcho 8	n/a	Thunder Bay	Western Antarctic Peninsula	2	2020	3.23011	2	50.3285	2	0.470457	2	3.02955	2	0.073	1	0.130079	1	0.123628	1	<LOD	6	n/d
Yelcho 9	n/a	Thunder Bay	Western Antarctic Peninsula	2	2020	11.4207	2	395.682	2	8.39378	2	13.8223	2	0.225	1	0.468466	1	0.449933	1	0.324787	1	n/d
Yelcho 10	n/a	Thunder Bay	Western Antarctic Peninsula	2	2020	128.774	2	4851.97	2	8.4952	2	85.0761	2	0.23	1	0.116434	1	0.107936	1	0.0538591	1	n/d
Yelcho 11	n/a	Thunder Bay	Western Antarctic Peninsula	2	2020	8.29404	2	234.201	2	1.62736	2	9.02527	2	0.096	1	0.103699	1	0.0986821	1	<LOD	6	n/d
Yelcho 12	n/a	Thunder Bay	Western Antarctic Peninsula	2	2020	2.87012	2	75.0341	2	0.428403	2	4.34767	2	0.076	1	0.0245603	1	<LOD	6	<LOD	6	n/d
Yelcho 13	n/a	Thunder Bay	Western Antarctic Peninsula	2	2020	2.42033	2	28.1742	2	0.331037	2	3.46757	2	0.064	1	0.0700424	1	0.0656397	1	<LOD	6	n/d
Yelcho 14	n/a	Thunder Bay	Western Antarctic Peninsula	2	2020	2.04323	2	37.9032	2	0.140573	2	2.31117	2	0.053	1	0.0300182	1	<LOD	6	<LOD	6	n/d
Yelcho 15	n/a	Thunder Bay	Western Antarctic Peninsula	2	2020	2.34593	2	41.8837	2	0.340332	2	2.02674	2	0.053	1	0.0536689	1	<LOD	6	<LOD	6	n/d
Yelcho B1 (Yelcho 16)	n/a	Neumayer Channel	Western Antarctic Peninsula	2	2020	46.3242	2	644.931	2	1.47519	2	12.9772	2	0.116	1	0.538508	1	0.536972	1	0.086501	1	n/d
Yelcho B2 (Yelcho 17)	n/a	Neumayer Channel	Western Antarctic Peninsula	2	2020	21.6994	2	303.033	2	1.87045	2	6.13062	2	0.388	1	0.621286	1	0.619135	1	0.173546	1	n/d
Yelcho B3 (Yelcho 18)	n/a	Neumayer Channel	Western Antarctic Peninsula	2	2020	10.9627	2	65.5343	2	2.76659	2	4.35173	2	0.085	1	0.0973317	1	0.0949768	1	0.069092	1	n/d
Yelcho B4	n/a	Neumayer Channel	Western Antarctic Peninsula	2	2020	20.4071	2	96.7253	2	7.68723	2	10.1595	2	n/d	9	n/d	9	n/d	9	n/d	9	n/d
Yelcho B5	n/a	Neumayer Channel	Western Antarctic Peninsula	2	2020	3.94129	2	32.112	2	0.561575	2	2.2581	2	n/d	9	n/d	9	n/d	9	n/d	9	n/d
Yelcho B6	n/a	Neumayer Channel	Western Antarctic Peninsula	2	2020	7.28437	2	324.941	2	0.4668	2	1.67137	2	n/d	9	n/d	9	n/d	9	n/d	9	n/d
Yelcho B7	n/a	Neumayer Channel	Western Antarctic Peninsula	2	2020	3.99787	2	44.2106	2	0.264451	2	0.628746	2	n/d	9	n/d	9	n/d	9	n/d	9	n/d
Yelcho B8	n/a	Neumayer Channel	Western Antarctic Peninsula	2	2020	10.8481	2	256.928	2	2.0311	2	4.21334	2	n/d	9	n/d	9	n/d	9	n/d	9	n/d
Yelcho B9	n/a	Neumayer Channel	Western Antarctic Peninsula	2	2020	43.9153	2	232.171	2	27.3182	2	26.0378	2	n/d	9	n/d	9	n/d	9	n/d	9	n/d
Yelcho B10	n/a	Neumayer Channel	Western Antarctic Peninsula	2	2020	8.32565	2	75.2396	2	0.691142	2	2.01025	2	n/d	9	n/d	9	n/d	9	n/d	9	n/d
Yelcho B11	n/a	Neumayer Channel	Western Antarctic Peninsula	2	2020	6.69353	2	152.785	2	1.56271	2	4.3393	2	n/d	9	n/d	9	n/d	9	n/d	9	n/d
Yelcho B12	n/a	Neumayer Channel	Western Antarctic Peninsula	2	2020	4.01895	2	51.6345	2	0.349677	2	0.669378	2	n/d	9	n/d	9	n/d	9	n/d	9	n/d
Yelcho B13	n/a	Neumayer Channel	Western Antarctic Peninsula	2	2020	4.63571	2	79.0098	2	0.756966	2	1.98262	2	n/d	9	n/d	9	n/d	9	n/d	9	n/d
Yelcho B14	n/a	Neumayer Channel	Western Antarctic Peninsula	2	2020	6.21391	2	55.489	2	0.583872	2	1.72988	2	n/d	9	n/d	9	n/d	9	n/d	9	n/d
Yelcho B15	n/a	Neumayer Channel	Western Antarctic Peninsula	2	2020	5.72641	2	103.941	2	0.948904	2	2.53847	2	n/d	9	n/d	9	n/d	9	n/d	9	n/d
Yelcho B16	n/a	Neumayer Channel	Western Antarctic Peninsula	2	2020	3.41213	2	27.5795	2	0.343176	2	1.38207	2	n/d	9	n/d	9	n/d	9	n/d	9	n/d
Yelcho B17	n/a	Neumayer Channel	Western Antarctic Peninsula	2	2020	119.858	2	410.915	2	4.79959	2	8.3489	2	n/d	9	n/d	9	n/d	9	n/d	9	n/d
Yelcho B18	n/a	Neumayer Channel	Western Antarctic Peninsula	2	2020	5.27515	2	34.0658	2	0.720804	2	0.966807	2	n/d	9	n/d	9	n/d	9	n/d	9	n/d
Yelcho B19	n/a	Neumayer Channel	Western Antarctic Peninsula	2	2020	2.80069	2	34.6501	2	0.558782	2	1.25611	2	n/d	9	n/d	9	n/d	9	n/d	9	n/d
Yelcho B20	n/a	Neumayer Channel	Western Antarctic Peninsula	2	2020	6.62795	2	538.292	2	0.644872	2	8.74141	2	n/d	9	n/d	9	n/d	9	n/d	9	n/d
Yelcho B21	n/a	Neumayer Channel	Western Antarctic Peninsula	2	2020	5.80638	2	31.0958	2	0.557918	2	1.0757	2	n/d	9	n/d	9	n/d	9	n/d	9	n/d
Yelcho B22	n/a	Neumayer Channel	Western Antarctic Peninsula	2	2020	83.3121	2	464.443	2	10.7254	2	14.3966	2	n/d	9	n/d	9	n/d	9	n/d	9	n/d
Yelcho B23	n/a	Thunder Bay	Western Antarctic Peninsula	2	2020	39.5695	2	709.687	2	14.3951	2	20.4996	2	n/d	9	n/d	9	n/d	9	n/d	9	n/d
Yelcho B24	n/a	Thunder Bay	Western Antarctic Peninsula	2	2020	27.4178	2	907	2	8.83707	2	23.4585	2	n/d	9	n/d	9	n/d	9	n/d	9	n/d
Yelcho B25	n/a	Thunder Bay	Western Antarctic Peninsula	2	2020	25.2314	2	528.633	2	2.93182	2	10.7381	2	n/d	9	n/d	9	n/d	9	n/d	9	n/d
Yelcho B26	n/a	Thunder Bay	Western Antarctic Peninsula	2	2020	43.6592	2	303.435	2	8.50313	2	10.7015	2	n/d	9	n/d	9	n/d	9	n/d	9	n/d
Yelcho B27	n/a	Thunder Bay	Western Antarctic Peninsula	2	2020	23.9865	2	301.667	2	13.4506	2	19.6049	2	n/d	9	n/d	9	n/d	9	n/d	9	n/d
Yelcho B28	n/a	Thunder Bay	Western Antarctic Peninsula	2	2020	45.0547	2	824.953	2	7.58829	2	29.7736	2	n/d	9	n/d	9	n/d	9	n/d	9	n/d
Yelcho B29	n/a	Thunder Bay	Western Antarctic Peninsula	2	2020	42.1341	2	514.11	2	1.40038	2	10.9859	2	n/d	9	n/d	9	n/d	9	n/d	9	n/d
Yelcho B30	n/a	Thunder Bay	Western Antarctic Peninsula	2	2020	48.4625	2	460.801	2	2.56668	2	8.561	2	n/d	9	n/d	9	n/d	9	n/d	9	n/d
Yelcho B31	n/a	Thunder Bay	Western Antarctic Peninsula	2	2020	31.6929	2	277.486	2	1.90514	2	4.93578	2	n/d	9	n/d	9	n/d	9	n/d	9	n/d
Yelcho B32	n/a	Thunder Bay	Western Antarctic Peninsula	2	2020	80.4189	2	782.771	2	7.83437	2	18.1056	2	n/d	9	n/d	9	n/d	9	n/d	9	n/d
Yelcho B33	n/a	Thunder Bay	Western Antarctic Peninsula	2	2020	249.613	2	8334.05	2	11.2031	2	130.259	2	n/d	9	n/d	9	n/d	9	n/d	9	n/d
Yelcho B34	n/a	Thunder Bay	Western Antarctic Peninsula	2	2020	16.2481	2	105.283	2	9.87686	2	68.9067	2	n/d	9	n/d	9	n/d	9	n/d	9	n/d
Yelcho B35	n/a	Thunder Bay	Western Antarctic Peninsula	2	2020	29.7011	2	446.746	2	2.94253	2	6.88922	2	n/d	9	n/d	9	n/d	9	n/d	9	n/d
Yelcho B36	n/a	Thunder Bay	Western Antarctic Peninsula	2	2020	287.485	2	499.493	2	11.2762	2	12.4266	2	n/d	9	n/d	9	n/d	9	n/d	9	n/d
Yelcho B37	n/a	Thunder Bay	Western Antarctic Peninsula	2	2020	1436.04	2	57423.2	2	47.2937	2	788.534	2	n/d	9	n/d	9	n/d	9	n/d	9	n/d
Yelcho B38	n/a	Thunder Bay	Western Antarctic Peninsula	2	2020	380.778	2	1086.85	2	14.7994	2	22.3791	2	n/d	9	n/d	9	n/d	9	n/d	9	n/d
Yelcho B39	n/a	Thunder Bay	Western Antarctic Peninsula	2	2020	56.3402	2	836.312	2	20.0887	2	26.1555	2	n/d	9	n/d	9	n/d	9	n/d	9	n/d
Yelcho B40	n/a	Thunder Bay	Western Antarctic Peninsula	2	2020	509.029	2	2094.87	2	41.507	2	61.76	2	n/d	9	n/d	9	n/d	9	n/d	9	n/d
Yelcho B41	n/a	Thunder Bay	Western Antarctic Peninsula	2	2020	98.1224	2	933.941	2	6.99993	2	18.7921	2	n/d	9	n/d	9	n/d	9	n/d	9	n/d
Yelcho B42	n/a	Thunder Bay	Western Antarctic Peninsula	2	2020	56.8792	2	1206.24	2	3.79393	2	22.6765	2	n/d	9	n/d	9	n/d	9	n/d	9	n/d
Yelcho B43	n/a	Thunder Bay	Western Antarctic Peninsula	2	2020	560.89	2	81548.2	2	17.8152	2	1390.12	2	n/d	9	n/d	9	n/d	9	n/d	9	n/d
Yelcho B44	n/a	Thunder Bay	Western Antarctic Peninsula	2	2020	35.1822	2	342.534	2	29.0783	2	30.2342	2	n/d	9	n/d	9	n/d	9	n/d	9	n/d
Yelcho B45	n/a	Thunder Bay	Western Antarctic Peninsula	2	2020	51.5738	2	1264.77	2	14.9666	2	35.2669	2	n/d	9	n/d	9	n/d	9	n/d	9	n/d
Yelcho B46	n/a	Thunder Bay	Western Antarctic Peninsula	2	2020	525.84	2	7614.61	2	49.9138	2	155.472	2	n/d	9	n/d	9	n/d	9	n/d	9	n/d
Yelcho B47	n/a	Thunder Bay	Western Antarctic Peninsula	2	2020	312.672	2	546.238	2	12.5399	2	15.7154	2	n/d	9	n/d	9	n/d	9	n/d	9	n/d
Yelcho B48	n/a	Thunder Bay	Western Antarctic Peninsula	2	2020	1384.33	2	2006.65	2	62.0947	2	70.8828	2	n/d	9	n/d	9	n/d	9	n/d	9	n/d
Yelcho B49	n/a	Thunder Bay	Western Antarctic Peninsula	2	2020	75.9435	2	609.185	2	3.16814	2	9.15651	2	n/d	9	n/d	9	n/d	9	n/d	9	n/d
Yelcho B50	n/a	Thunder Bay	Western Antarctic Peninsula	2	2020	177.361	2	1453.57	2	51.0084	2	65.5421	2	n/d	9	n/d	9	n/d	9	n/d	9	n/d
Yelcho B51	n/a	Thunder Bay	Western Antarctic Peninsula	2	2020	27.5013	2	252.698	2	0.812531	2	3.99538	2	n/d	9	n/d	9	n/d	9	n/d	9	n/d
Yelcho B52	n/a	Thunder Bay	Western Antarctic Peninsula	2	2020	48.496	2	474.482	2	3.18907	2	10.0325	2	n/d	9	n/d	9	n/d	9	n/d	9	n/d
Yelcho B53	n/a	Thunder Bay	Western Antarctic Peninsula	2	2020	23.5314	2	212.12	2	1.05338	2	2.57325	2	n/d	9	n/d	9	n/d	9	n/d	9	n/d
Yelcho B54	n/a	Thunder Bay	Western Antarctic Peninsula	2	2020	n/d	9	5830.79	2	n/d	9	92.8763	2	n/d	9	n/d	9	n/d	9	n/d	9	n/d
Yelcho B55	n/a	Thunder Bay	Western Antarctic Peninsula	2	2020	113.085	2	925.686	2	27.7907	2	32.9443	2	n/d	9	n/d	9	n/d	9	n/d	9	n/d
Yelcho B56	n/a	Thunder Bay	Western Antarctic Peninsula	2	2020	64.127	2	254.015	2	7.01999	2	7.28661	2	n/d	9	n/d	9	n/d	9	n/d	9	n/d
Yelcho B57a	n/a	Thunder Bay	Western Antarctic Peninsula	2	2020	14.7904	2	92.654	2	28.4258	2	1.34046	2	n/d	9	n/d	9	n/d	9	n/d	9	n/d
Yelcho B57b	n/a	Thunder Bay	Western Antarctic Peninsula	2	2020	23.6817	2	2807.61	2	0.931381	2	64.8058	2	n/d	9	n/d	9	n/d	9	n/d	9	n/d
Yelcho B58	n/a	Thunder Bay	Western Antarctic Peninsula	2	2020	34.9522	2	202.607	2	34.2829	2	29.4695	2	n/d	9	n/d	9	n/d	9	n/d	9	n/d
Yelcho B59	n/a	Thunder Bay	Western Antarctic Peninsula	2	2020	3198.71	2	6037.79	2	152.5	2	148.77	2	n/d	9	n/d	9	n/d	9	n/d	9	n/d
Yelcho B60	n/a	Thunder Bay	Western Antarctic Peninsula	2	2020	1302.58	2	3042.78	2	49.5316	2	64.0964	2	n/d	9	n/d	9	n/d	9	n/d	9	n/d
Yelcho B61	n/a	Thunder Bay	Western Antarctic Peninsula	2	2020	271.642	2	1137.56	2	11.1383	2	17.1416	2	n/d	9	n/d	9	n/d	9	n/d	9	n/d
Yelcho B62	n/a	Thunder Bay	Western Antarctic Peninsula	2	2020	15.266	2	1261.64	2	0.797294	2	18.1598	2	n/d	9	n/d	9	n/d	9	n/d	9	n/d
Yelcho B63	n/a	Thunder Bay	Western Antarctic Peninsula	2	2020	49.9496	2	369.093	2	51.5935	2	45.7744	2	n/d	9	n/d	9	n/d	9	n/d	9	n/d
Yelcho B64	n/a	Thunder Bay	Western Antarctic Peninsula	2	2020	41.6769	2	439.614	2	29.6093	2	29.7271	2	n/d	9	n/d	9	n/d	9	n/d	9	n/d
Yelcho B65	n/a	Thunder Bay	Western Antarctic Peninsula	2	2020	1051.71	2	1065.4	2	31.4634	2	29.1046	2	n/d	9	n/d	9	n/d	9	n/d	9	n/d
Yelcho Y66	n/a	South Bay	Western Antarctic Peninsula	2	2020	2941.27	2	9397.96	2	164.269	2	220.34	2	n/d	9	n/d	9	n/d	9	n/d	9	n/d
Yelcho Y68	n/a	South Bay	Western Antarctic Peninsula	2	2020	40.4456	2	35621.3	2	242.169	2	936.294	2	n/d	9	n/d	9	n/d	9	n/d	9	n/d
Yelcho Y69	n/a	South Bay	Western Antarctic Peninsula	2	2020	16.0726	2	7596.81	2	43.2961	2	216.726	2	n/d	9	n/d	9	n/d	9	n/d	9	n/d
Yelcho Y70	n/a	South Bay	Western Antarctic Peninsula	2	2020	136.683	2	1802.4	2	31.7851	2	45.9687	2	n/d	9	n/d	9	n/d	9	n/d	9	n/d
Yelcho Y71	n/a	South Bay	Western Antarctic Peninsula	2	2020	267.782	2	352.035	2	12.4994	2	11.8439	2	n/d	9	n/d	9	n/d	9	n/d	9	n/d
Yelcho Y72	n/a	South Bay	Western Antarctic Peninsula	2	2020	15.4815	2	4181.05	2	23.7262	2	105.481	2	n/d	9	n/d	9	n/d	9	n/d	9	n/d
Yelcho Y73	n/a	South Bay	Western Antarctic Peninsula	2	2020	41.5307	2	524.193	2	6.92847	2	11.5002	2	n/d	9	n/d	9	n/d	9	n/d	9	n/d
Yelcho Y74	n/a	South Bay	Western Antarctic Peninsula	2	2020	44.09	2	1261.29	2	12.0391	2	47.2795	2	n/d	9	n/d	9	n/d	9	n/d	9	n/d
Yelcho Y75	n/a	South Bay	Western Antarctic Peninsula	2	2020	48.0795	2	4022.35	2	46.9904	2	113.757	2	n/d	9	n/d	9	n/d	9	n/d	9	n/d
Yelcho Y76	n/a	South Bay	Western Antarctic Peninsula	2	2020	2367.7	2	4546.89	2	149.108	2	111.839	2	n/d	9	n/d	9	n/d	9	n/d	9	n/d
Yelcho Y77	n/a	South Bay	Western Antarctic Peninsula	2	2020	31.7301	2	10632.1	2	101.547	2	267.761	2	n/d	9	n/d	9	n/d	9	n/d	9	n/d
Yelcho Y78	n/a	South Bay	Western Antarctic Peninsula	2	2020	35.1307	2	2850.49	2	26.9852	2	65.4202	2	n/d	9	n/d	9	n/d	9	n/d	9	n/d
Yelcho Y79	n/a	South Bay	Western Antarctic Peninsula	2	2020	3839.96	2	33409.5	2	444.701	2	748.97	2	n/d	9	n/d	9	n/d	9	n/d	9	n/d
Yelcho Y80	n/a	South Bay	Western Antarctic Peninsula	2	2020	108.47	2	745.835	2	48.7468	2	49.2989	2	n/d	9	n/d	9	n/d	9	n/d	9	n/d
Yelcho Y81	n/a	South Bay	Western Antarctic Peninsula	2	2020	29.8773	2	624.778	2	3.83736	2	18.2452	2	n/d	9	n/d	9	n/d	9	n/d	9	n/d
Yelcho Y82	n/a	South Bay	Western Antarctic Peninsula	2	2020	31.6244	2	338.567	2	8.54351	2	8.40969	2	n/d	9	n/d	9	n/d	9	n/d	9	n/d
Yelcho Y82b	n/a	South Bay	Western Antarctic Peninsula	2	2020	25.0691	2	794.256	2	3.58046	2	11.3604	2	n/d	9	n/d	9	n/d	9	n/d	9	n/d
"Beluga" iceberg fragments	n/a	Ilulissat	Greenland	8	2022	13.2068	2	303.758	2	2.97485	2	5.2691	2	0.129	1	1.118	1	1.114	1	0.053	1	n/d
"Beluga" iceberg fragments	n/a	Ilulissat	Greenland	8	2022	10.1889	2	148.526	2	2.40788	2	3.38282	2	0.045	1	1.101	1	1.095	1	0.101	1	n/d
"Beluga" iceberg fragments	n/a	Ilulissat	Greenland	8	2022	12.8632	2	193.794	2	1.41865	2	2.44145	2	0.079	1	1.031	1	1.026	1	<LOD	6	n/d
"Beluga" iceberg fragments	n/a	Ilulissat	Greenland	8	2022	n/d	9	n/d	9	n/d	9	n/d	9	0.099	1	1.611	1	1.605	1	0.065	1	n/d
"Beluga" iceberg fragments	n/a	Ilulissat	Greenland	8	2022	n/d	9	n/d	9	n/d	9	n/d	9	0.047	1	1.323	1	1.32	1	0.02	1	n/d
"Beluga" iceberg fragments	n/a	Ilulissat	Greenland	8	2022	n/d	9	n/d	9	n/d	9	n/d	9	0.135	1	1.359	1	1.355	1	0.064	1	n/d
"Beluga" iceberg fragments	n/a	Ilulissat	Greenland	8	2022	n/d	9	n/d	9	n/d	9	n/d	9	0.065	1	1.033	1	1.029	1	0.136	1	n/d
"Beluga" iceberg fragments	n/a	Ilulissat	Greenland	8	2022	n/d	9	n/d	9	n/d	9	n/d	9	0.08	1	0.998	1	0.997	1	0.043	1	n/d
"Beluga" iceberg fragments	n/a	Ilulissat	Greenland	8	2022	n/d	9	n/d	9	n/d	9	n/d	9	0.246	1	0.292	1	0.286	1	1.365	1	n/d
"Beluga" iceberg fragments	n/a	Ilulissat	Greenland	8	2022	n/d	9	n/d	9	n/d	9	n/d	9	0.063	1	0.426	1	0.424	1	0.024	1	n/d
"Beluga" iceberg fragments	n/a	Ilulissat	Greenland	8	2022	n/d	9	n/d	9	n/d	9	n/d	9	0.058	1	0.402	1	0.398	1	<LOD	6	n/d
"Beluga" iceberg fragments	n/a	Ilulissat	Greenland	8	2022	n/d	9	n/d	9	n/d	9	n/d	9	0.064	1	0.886	1	0.883	1	0.043	1	n/d
"Narwhale" iceberg fragments	n/a	Ilulissat	Greenland	8	2022	16.5055	2	28.9671	2	1.86071	2	0.896789	2	0.013	1	1.338	1	1.336	1	<LOD	6	n/d
"Narwhale" iceberg fragments	n/a	Ilulissat	Greenland	8	2022	24.2473	2	781.697	2	1.81152	2	6.64218	2	0.013	1	1.106	1	1.104	1	0.148	1	n/d
"Narwhale" iceberg fragments	n/a	Ilulissat	Greenland	8	2022	15.1058	2	38.5267	2	0.975099	2	1.20055	2	0.014	1	1.025	1	1.023	1	<LOD	6	n/d
"Narwhale" iceberg fragments	n/a	Ilulissat	Greenland	8	2022	6.95847	2	57.7154	2	1.07898	2	1.32652	2	0.028	1	1.258	1	1.256	1	<LOD	6	n/d
"Narwhale" iceberg fragments	n/a	Ilulissat	Greenland	8	2022	10.8565	2	127.913	2	1.55171	2	1.79299	2	0.013	1	1.035	1	1.034	1	<LOD	6	n/d
"Narwhale" iceberg fragments	n/a	Ilulissat	Greenland	8	2022	15.3041	2	29.8584	2	1.38834	2	1.21321	2	0.026	1	1.012	1	1.012	1	0.037	1	n/d
"Narwhale" iceberg fragments	n/a	Ilulissat	Greenland	8	2022	10.1091	2	77.4832	2	0.674565	2	0.819961	2	0.011	1	0.736	1	0.736	1	0.021	1	n/d
"Narwhale" iceberg fragments	n/a	Ilulissat	Greenland	8	2022	5.79308	2	27.2482	2	0.75404	2	0.944177	2	<LOD	6	0.93	1	0.931	1	<LOD	6	n/d
"Narwhale" iceberg fragments	n/a	Ilulissat	Greenland	8	2022	6.57724	2	23.1207	2	0.751393	2	0.738473	2	<LOD	6	1.129	1	1.13	1	<LOD	6	n/d
"Narwhale" iceberg fragments	n/a	Ilulissat	Greenland	8	2022	7.86623	2	40.8905	2	0.810271	2	1.50426	2	<LOD	6	1.074	1	1.075	1	<LOD	6	n/d
"Narwhale" iceberg fragments	n/a	Ilulissat	Greenland	8	2022	n/d	9	n/d	9	n/d	9	n/d	9	0.012	1	0.727	1	0.728	1	<LOD	6	n/d
"Narwhale" iceberg fragments	n/a	Ilulissat	Greenland	8	2022	n/d	9	n/d	9	n/d	9	n/d	9	<LOD	6	1.093	1	1.093	1	<LOD	6	n/d
"Narwhale" iceberg fragments	n/a	Ilulissat	Greenland	8	2022	n/d	9	n/d	9	n/d	9	n/d	9	0.012	1	1.353	1	1.353	1	<LOD	6	n/d
"Narwhale" iceberg fragments	n/a	Ilulissat	Greenland	8	2022	n/d	9	n/d	9	n/d	9	n/d	9	0.012	1	0.963	1	0.963	1	0.024	1	n/d
"Narwhale" iceberg fragments	n/a	Ilulissat	Greenland	8	2022	n/d	9	n/d	9	n/d	9	n/d	9	0.02	1	1.406	1	1.405	1	<LOD	6	n/d
"Narwhale" iceberg fragments	n/a	Ilulissat	Greenland	8	2022	n/d	9	n/d	9	n/d	9	n/d	9	0.012	1	2.092	1	2.091	1	<LOD	6	n/d
"Narwhale" iceberg fragments	n/a	Ilulissat	Greenland	8	2022	n/d	9	n/d	9	n/d	9	n/d	9	0.016	1	1.339	1	1.339	1	0.024	1	n/d
"Narwhale" iceberg fragments	n/a	Ilulissat	Greenland	8	2022	n/d	9	n/d	9	n/d	9	n/d	9	0.019	1	1.342	1	1.343	1	<LOD	6	n/d
Jakobshavn Isbræ	n/a	Ilulissat	Greenland	8	2022	10.8702	2	214.508	2	1.2238	2	2.45906	2	0.093	1	0.154	1	0.152	1	0.07	1	n/d
Jakobshavn Isbræ	n/a	Ilulissat	Greenland	8	2022	14.0772	2	416.189	2	5.86768	2	18.1631	2	0.167	1	1.025	1	1.026	1	0.026	1	n/d
Jakobshavn Isbræ	n/a	Ilulissat	Greenland	8	2022	13.166	2	346.332	2	1.44337	2	3.78793	2	0.068	1	1.164	1	1.165	1	0.029	1	n/d
Jakobshavn Isbræ	n/a	Ilulissat	Greenland	8	2022	14.5639	2	n/d	9	1.00189	2	n/d	9	0.025	1	0.9	1	0.901	1	<LOD	6	n/d
Jakobshavn Isbræ	n/a	Ilulissat	Greenland	8	2022	4.21835	2	63.7032	2	0.809636	2	1.2759	2	0.021	1	1.127	1	1.128	1	<LOD	6	n/d
Jakobshavn Isbræ	n/a	Ilulissat	Greenland	8	2022	12.1486	2	589.598	2	7.52353	2	13.2716	2	0.161	1	1.621	1	1.619	1	0.06	1	n/d
Jakobshavn Isbræ	n/a	Ilulissat	Greenland	8	2022	18.0149	2	1069.45	2	8.27216	2	17.5922	2	0.248	1	1.746	1	1.744	1	0.075	1	n/d
Jakobshavn Isbræ	n/a	Ilulissat	Greenland	8	2022	17.9612	2	357.531	2	1.95046	2	4.53701	2	0.089	1	1.13	1	1.13	1	0.054	1	n/d
Jakobshavn Isbræ	n/a	Ilulissat	Greenland	8	2022	27.5131	2	566.016	2	3.62717	2	6.92019	2	0.115	1	1.144	1	1.141	1	0.087	1	n/d
Jakobshavn Isbræ	n/a	Ilulissat	Greenland	8	2022	9.12642	2	171.155	2	1.61524	2	2.72255	2	0.064	1	1.289	1	1.289	1	0.023	1	n/d
Jakobshavn Isbræ	n/a	Ilulissat	Greenland	8	2022	n/d	9	n/d	9	n/d	9	n/d	9	0.083	1	0.691	1	0.689	1	0.144	1	n/d
Jakobshavn Isbræ	n/a	Ilulissat	Greenland	8	2022	n/d	9	n/d	9	n/d	9	n/d	9	0.047	1	0.684	1	0.683	1	<LOD	6	n/d
Jakobshavn Isbræ	n/a	Ilulissat	Greenland	8	2022	n/d	9	n/d	9	n/d	9	n/d	9	0.035	1	0.949	1	0.948	1	0.021	1	n/d
Jakobshavn Isbræ	n/a	Ilulissat	Greenland	8	2022	n/d	9	n/d	9	n/d	9	n/d	9	0.09	1	1.647	1	1.648	1	0.053	1	n/d
Eqip Sermia	n/a	Eqip Sermia	Greenland	8	2022	n/d	9	n/d	9	n/d	9	n/d	9	0.042	1	0.988	1	0.989	1	0.02	1	n/d
Eqip Sermia	n/a	Eqip Sermia	Greenland	8	2022	n/d	9	n/d	9	n/d	9	n/d	9	0.076	1	0.567	1	0.563	1	0.042	1	n/d
Eqip Sermia	n/a	Eqip Sermia	Greenland	8	2022	n/d	9	n/d	9	n/d	9	n/d	9	0.035	1	1.186	1	1.186	1	0.018	1	n/d
Eqip Sermia	n/a	Eqip Sermia	Greenland	8	2022	n/d	9	n/d	9	n/d	9	n/d	9	0.037	1	1.101	1	1.101	1	0.025	1	n/d
Eqip Sermia	n/a	Eqip Sermia	Greenland	8	2022	n/d	9	n/d	9	n/d	9	n/d	9	0.069	1	0.745	1	0.743	1	0.051	1	n/d
Eqip Sermia	n/a	Eqip Sermia	Greenland	8	2022	n/d	9	n/d	9	n/d	9	n/d	9	0.036	1	1.117	1	1.116	1	0.039	1	n/d
Eqip Sermia	n/a	Eqip Sermia	Greenland	8	2022	n/d	9	n/d	9	n/d	9	n/d	9	0.063	1	0.126	1	0.124	1	0.03	1	n/d
Eqip Sermia	n/a	Eqip Sermia	Greenland	8	2022	n/d	9	n/d	9	n/d	9	n/d	9	0.04	1	0.868	1	0.868	1	0.037	1	n/d
Eqip Sermia	n/a	Eqip Sermia	Greenland	8	2022	n/d	9	n/d	9	n/d	9	n/d	9	0.039	1	0.932	1	0.932	1	<LOD	6	n/d
Eqip Sermia	n/a	Eqip Sermia	Greenland	8	2022	n/d	9	n/d	9	n/d	9	n/d	9	0.025	1	0.087	1	0.088	1	<LOD	6	n/d
Eqip Sermia	n/a	Eqip Sermia	Greenland	8	2022	n/d	9	n/d	9	n/d	9	n/d	9	0.027	1	0.099	1	0.099	1	<LOD	6	n/d
Eqip Sermia	n/a	Eqip Sermia	Greenland	8	2022	n/d	9	n/d	9	n/d	9	n/d	9	0.028	1	0.094	1	0.094	1	<LOD	6	n/d
Eqip Sermia	n/a	Eqip Sermia	Greenland	8	2022	43.9598	2	512.778	2	8.44356	2	14.3385	2	0.035	1	0.844	1	0.844	1	0.119	1	n/d
Eqip Sermia	n/a	Eqip Sermia	Greenland	8	2022	15.0423	2	586.754	2	1.69588	2	9.26706	2	0.032	1	0.157	1	0.158	1	0.082	1	n/d
Eqip Sermia	n/a	Eqip Sermia	Greenland	8	2022	6.41349	2	180.084	2	0.137934	2	1.15671	2	0.028	1	0.092	1	0.092	1	0.024	1	n/d
Eqip Sermia	n/a	Eqip Sermia	Greenland	8	2022	10.984	2	64.5067	2	1.16492	2	1.80835	2	0.029	1	1.348	1	1.349	1	0.018	1	n/d
Eqip Sermia	n/a	Eqip Sermia	Greenland	8	2022	21.3948	2	173.982	2	4.22157	2	6.34082	2	0.03	1	1.158	1	1.158	1	0.032	1	n/d
Eqip Sermia	n/a	Eqip Sermia	Greenland	8	2022	18.6525	2	98.3214	2	1.86071	2	2.9354	2	0.029	1	1.175	1	1.175	1	0.022	1	n/d
Eqip Sermia	n/a	Eqip Sermia	Greenland	8	2022	90.5868	2	13921.9	2	22.345	2	273.436	2	0.049	1	0.214	1	0.212	1	1.481	1	n/d
Eqip Sermia	n/a	Eqip Sermia	Greenland	8	2022	14.824	2	54122.9	2	70.6428	2	1038.61	2	0.071	1	0.105	1	0.105	1	3.446	1	n/d
Eqip Sermia	n/a	Eqip Sermia	Greenland	8	2022	25.3148	2	1347.26	2	1.53635	2	27.84	2	0.044	1	0.374	1	0.374	1	0.01	1	n/d
Eqip Sermia	n/a	Eqip Sermia	Greenland	8	2022	13.3372	2	1674.74	2	1.61937	2	24.9053	2	0.03	1	0.089	1	0.088	1	0.034	1	n/d
Eqip Sermia	n/a	Eqip Sermia	Greenland	8	2022	9.13833	2	483.239	2	0.836163	2	7.51363	2	0.031	1	1.276	1	1.275	1	0.009	1	n/d
Eqip Sermia	n/a	Eqip Sermia	Greenland	8	2022	8.03773	2	140.549	2	0.589212	2	2.2781	2	0.034	1	0.092	1	0.09	1	0.157	1	n/d
Eqip Sermia	n/a	Eqip Sermia	Greenland	8	2022	5.92589	2	14.8673	2	0.301174	2	<LOD	6	0.032	1	0.11	1	0.109	1	0.139	1	n/d
Eqip Sermia	n/a	Eqip Sermia	Greenland	8	2022	n/d	9	n/d	9	n/d	9	n/d	9	0.031	1	1.034	1	1.033	1	0.078	1	n/d
Eqip Sermia	n/a	Eqip Sermia	Greenland	8	2022	n/d	9	n/d	9	n/d	9	n/d	9	0.078	1	0.133	1	0.132	1	0.086	1	n/d
Eqip Sermia	n/a	Eqip Sermia	Greenland	8	2022	n/d	9	n/d	9	n/d	9	n/d	9	0.03	1	0.098	1	0.097	1	0.054	1	n/d
Eqip Sermia	n/a	Eqip Sermia	Greenland	8	2022	n/d	9	n/d	9	n/d	9	n/d	9	0.033	1	0.185	1	0.183	1	0.061	1	n/d
Eqip Sermia	n/a	Eqip Sermia	Greenland	8	2022	n/d	9	n/d	9	n/d	9	n/d	9	0.038	1	0.933	1	0.931	1	0.058	1	n/d
Eqip Sermia	n/a	Eqip Sermia	Greenland	8	2022	n/d	9	n/d	9	n/d	9	n/d	9	0.033	1	0.118	1	0.116	1	0.053	1	n/d
Eqip Sermia	n/a	Eqip Sermia	Greenland	8	2022	n/d	9	n/d	9	n/d	9	n/d	9	0.042	1	1.048	1	1.047	1	0.027	1	n/d
Eqip Sermia	n/a	Eqip Sermia	Greenland	8	2022	n/d	9	n/d	9	n/d	9	n/d	9	0.029	1	0.1	1	0.099	1	<LOD	6	n/d
Eqip Sermia	n/a	Eqip Sermia	Greenland	8	2022	n/d	9	n/d	9	n/d	9	n/d	9	0.029	1	0.447	1	0.445	1	<LOD	6	n/d
Eqip Sermia	n/a	Eqip Sermia	Greenland	8	2022	n/d	9	n/d	9	n/d	9	n/d	9	0.035	1	0.091	1	0.09	1	<LOD	6	n/d
Eqip Sermia	n/a	Eqip Sermia	Greenland	8	2022	n/d	9	n/d	9	n/d	9	n/d	9	0.031	1	0.107	1	0.105	1	<LOD	6	n/d
Eqip Sermia	n/a	Eqip Sermia	Greenland	8	2022	n/d	9	n/d	9	n/d	9	n/d	9	0.031	1	1.182	1	1.182	1	<LOD	6	n/d
Eqip Sermia	n/a	Eqip Sermia	Greenland	8	2022	n/d	9	n/d	9	n/d	9	n/d	9	0.033	1	1.641	1	1.639	1	<LOD	6	n/d
Eqip Sermia	n/a	Eqip Sermia	Greenland	8	2022	n/d	9	n/d	9	n/d	9	n/d	9	0.026	1	0.095	1	0.094	1	<LOD	6	n/d
Eqip Sermia	n/a	Eqip Sermia	Greenland	8	2022	n/d	9	n/d	9	n/d	9	n/d	9	0.036	1	0.855	1	0.854	1	0.034	1	n/d
Eqip Sermia	n/a	Eqip Sermia	Greenland	8	2022	n/d	9	n/d	9	n/d	9	n/d	9	0.029	1	0.983	1	0.982	1	<LOD	6	n/d
Eqip Sermia	n/a	Eqip Sermia	Greenland	8	2022	n/d	9	n/d	9	n/d	9	n/d	9	0.034	1	0.923	1	0.921	1	<LOD	6	n/d
Eqip Sermia	n/a	Eqip Sermia	Greenland	8	2022	n/d	9	n/d	9	n/d	9	n/d	9	0.03	1	1.464	1	1.461	1	0.023	1	n/d
Saqqarleq Fjord–Saqqarliup Sermia	n/a	Saqqarleq Fjord–Saqqarliup Sermia	Greenland	8	2022	n/d	9	n/d	9	n/d	9	n/d	9	0.045	1	0.154	1	0.152	1	0.274	1	n/d
Saqqarleq Fjord–Saqqarliup Sermia	n/a	Saqqarleq Fjord–Saqqarliup Sermia	Greenland	8	2022	n/d	9	n/d	9	n/d	9	n/d	9	0.053	1	0.15	1	0.148	1	0.306	1	n/d
Saqqarleq Fjord–Saqqarliup Sermia	n/a	Saqqarleq Fjord–Saqqarliup Sermia	Greenland	8	2022	n/d	9	n/d	9	n/d	9	n/d	9	0.047	1	0.148	1	0.147	1	0.119	1	n/d
