# Supplementary material for: The macronutrient and micronutrient (iron and manganese) content of icebergs
Source: Copernicus journal article supplement (doi:10.5194/tc-18-5735-2024), 2024-12-10
Supplement: Supplementary file 2 [file tc-18-5735-2024-supplement.zip]

## 1 Supplementary Material

| Region     | Locality                                          | Number of samples | Previously reported details                  | Link to prior work(s)                                                             |
|------------|---------------------------------------------------|-------------------|----------------------------------------------|-----------------------------------------------------------------------------------|
| Antarctica | Andvord Bay                                       | 16                | 12 new samples, 4 literature values          | Forsch et al., 2021                                                               |
| Antarctica | Fildes Bay                                        | 24                | 19 new samples, 5 previously reported        | Höfer et al., 2019                                                                |
| Antarctica | Flandres Bay                                      | 15                | New samples                                  | n/a                                                                               |
| Antarctica | Marion Cove                                       | 16                | New samples                                  | n/a                                                                               |
| Antarctica | Nelson Glacier                                    | 30                | New samples                                  | n/a                                                                               |
| Antarctica | Neumayer Channel                                  | 22                | New samples                                  | n/a                                                                               |
| Antarctica | South Bay                                         | 17                | New samples                                  | n/a                                                                               |
| Antarctica | Thunder Bay                                       | 59                | New samples                                  | n/a                                                                               |
| Antarctica | WAP and Polar Front                               | 9                 | Literature values                            | De Baar et al., 1995; Lin et al., 2011; Loscher et al., 1997; Martin et al., 1990 |
| Antarctica | Wilhelmina Bay                                    | 14                | New samples                                  | n/a                                                                               |
| Antarctica | Yelcho                                            | 26                | Previously reported for Fe                   | Höfer et al., 2019; Hopwood et al., 2019                                          |
| Baffin Bay | Bylot Island                                      | 1                 | Literature value                             | Campbell & Yeats, 1982                                                            |
| Greenland  | Disko Bay                                         | 30                | New samples                                  | n/a                                                                               |
| Greenland  | Eqip Glacier                                      | 62                | 58 new samples, 4 previously reported for Fe | Hopwood et al., 2019                                                              |
| Greenland  | Ilulissat Icefjord                                | 26                | 24 new samples, 2 previously reported for Fe | Hopwood et al., 2019                                                              |
| Greenland  | Nioghalvfjærdsbræ                                 | 26                | Previously reported for Fe                   | Hopwood et al., 2019                                                              |
| Greenland  | Nuup Kangerlua (otherwise known as Godthåbsfjord) | 86                | 49 new samples, 37 previously reported       | Hopwood et al., 2016, 2019                                                        |
| Greenland  | Saqqarleq Fjord–Saqqarliup Sermia                 | 3                 | New samples                                  | n/a                                                                               |
| Greenland  | Upernavik                                         | 9                 | Previously reported for Fe                   | Hopwood et al., 2019                                                              |
| Greenland  | Uumanaaq                                          | 8                 | Previously reported for Fe                   | Hopwood et al., 2019                                                              |
| Iceland    | Jökulsárlón                                       | 9                 | Previously reported for Fe                   | Hopwood et al., 2019                                                              |
| Patagonia  | PIA fjord                                         | 15                | Previously reported for Fe                   | Hopwood et al., 2019                                                              |

|          |              |    |                               |                               |
|----------|--------------|----|-------------------------------|-------------------------------|
| Svalbard | Kongsfjorden | 48 | Previously reported<br>for Fe | Hopwood et al.,<br>2017, 2019 |
|----------|--------------|----|-------------------------------|-------------------------------|

Supplementary Table 1. Details of all samples referred to (inclusive of prior literature).

| Runoff Location                                                                    | dSi /<br>μM | NO <sub>x</sub> /<br>μM | PO <sub>4</sub> /<br>μM |
|------------------------------------------------------------------------------------|-------------|-------------------------|-------------------------|
| Beagle Channel (close to Pia fjord), n=2                                           | 38.79       | 3.57                    | 0.29                    |
| Beagle Channel Yendegaia fjord, n=3                                                | 44.34       | 2.82                    | 0.34                    |
| Saqqarleq Fjord–Saqqarliup Sermia (close to Jakobshavn Isbræ, west Greenland), n=2 | 18.83       | 0.65                    | 0.17                    |
| Doumer Island (close to South Bay, Western Antarctic Peninsula), n=10              | 1.20        | 0.17                    | 0.02                    |
| Kongsfjorden (Svalbard), n=37                                                      | 4.12        | 2.50                    | 0.12                    |
| Saqqap Sermersua (Nuup Kangerlua, southwest Greenland) n=3                         | 33          | 2.50                    | 0.30                    |

Supplementary Table 2. Runoff concentrations corresponding to iceberg collection sites. Doumer Island data from Krause et al., (2021). Kongsfjorden data from Cantoni et al., (2020). Nuup Kangerlua data from Meire et al., (2016).

| Zone     | Ice origin                | NO <sub>x</sub> (μM) | PO <sub>4</sub> (μM) | dSi (μM)           |
|----------|---------------------------|----------------------|----------------------|--------------------|
| Coastal  | Equip Sermia (n=43)       | 0.61 ± 0.50 (0.57)   | 0.04 ± 0.01 (0.03)   | 0.15 ± 0.56 (0.03) |
|          | Ilulissat Icefjord (n=14) | 1.09 ± 0.43 (1.14)   | 0.09 ± 0.07 (0.09)   | 0.05 ± 0.03 (0.04) |
| Offshore | Iceberg ‘Beluga’ (n=12)   | 0.97 ± 0.41 (1.03)   | 0.09 ± 0.06 (0.07)   | 0.16 ± 0.38 (0.05) |
|          | Iceberg ‘Narwhal’ (n=18)  | 1.16 ± 0.31 (1.10)   | 0.01 ± 0.01 (0.01)   | 0.01 ± 0.04 (0.00) |

Supplementary Table 3. Nutrient concentrations in ice from four distinct zones within Disko Bay. Zones as per Fig. 3. Summarized as mean ± standard deviation (median), ‘n’ is the number of samples.

| <b>(Micro)<br/>Nutrient</b> | <b>May 2014<br/>(n=13)</b>    | <b>July 2015<br/>(n=21)</b>    | <b>August 2018<br/>(n=9)</b> | <b>May 2019<br/>(n=18)</b> | <b>September<br/>2019 (n=22)</b> |
|-----------------------------|-------------------------------|--------------------------------|------------------------------|----------------------------|----------------------------------|
| dFe / nM                    | 37.86 ±<br>88.94<br>(12.15)   | n/d                            | 12.65 ± 9.68<br>(17.14)      | 10.82 ±<br>11.27 (5.32)    | 6.57 ± 2.58<br>(6.08)            |
| TdFe / nM                   | 306.78 ±<br>491.61<br>(94.82) | 520.04 ±<br>1127.44<br>(27.54) | 47.69 ±<br>60.33<br>(27.96)  | n/d                        | 32.48 ±<br>36.22 (20.30)         |
| dMn / nM                    | n/d                           | n/d                            | 0.87 ± 0.70<br>(0.67)        | 0.82 ± 0.66<br>(0.71)      | n/d                              |
| TdMn / nM                   | n/d                           | n/d                            | 1.52 ± 1.25<br>(1.06)        | n/d                        | 1.14 ± 0.65<br>(0.95)            |
| PO <sub>4</sub> / μM        | 0.03 ± 0.04<br>(0.02)         | 0.04 ± 0.02<br>(0.04)          | 0.05 ± 0.10<br>(0.00)        | 0.02 ± 0.06<br>0.00        | All b/d                          |
| NO <sub>x</sub> / μM        | 1.96 ± 1.68<br>(1.59)         | 1.79 ± 0.97<br>(1.77)          | 0.79 ± 0.51<br>(0.69)        | 0.49 ± 0.63<br>(0.27)      | 0.62 ± 0.40<br>(0.64)            |
| dSi / μM                    | All b/d                       | 0.25 ± 0.22<br>(0.19)          | 0.61 ± 0.73<br>(0.32)        | 0.22 ± 0.54<br>(0.09)      | 0.57 ± 0.45<br>(0.64)            |

Supplementary Table 4. (Micro)nutrient concentrations in ice from repeat sampling of ice in Nuup Kangerlua (southwest Greenland), otherwise known as Godthåbsfjorden. Concentrations summarized as mean ± standard deviation (median), ‘n’ is the number of nutrient samples. ‘n/d’ represents no data, ‘All b/d’ means samples were all below the detection limit. 2014 data are from Hopwood et al., (2016). 2015 Fe data are from Hopwood et al., (2019).

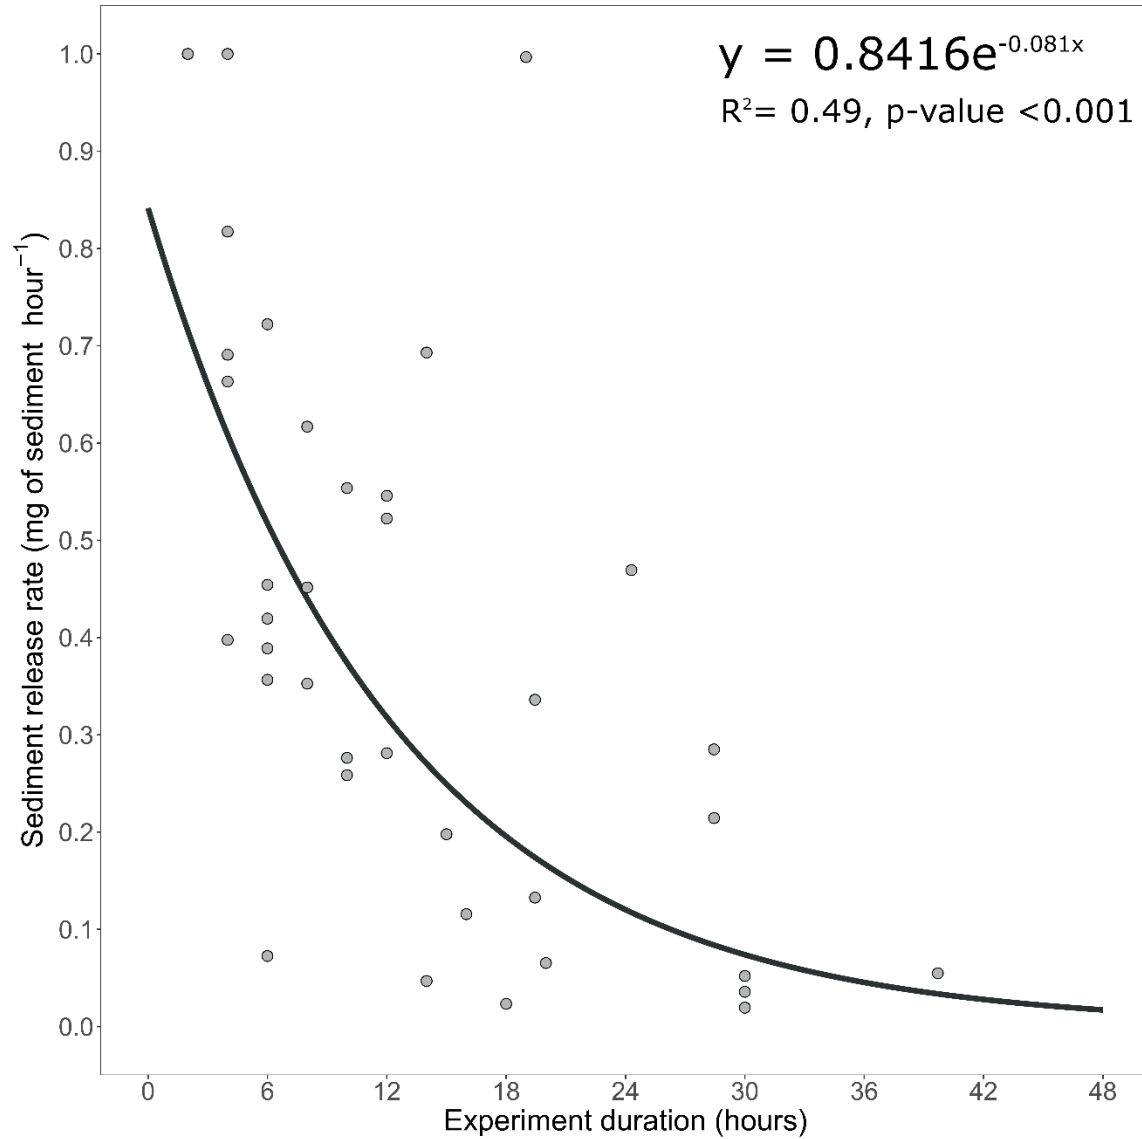

Supplementary Figure 1. Sediment released from large (10–45 kg) fragments of ice collected in Maxwell Bay, which were specifically targeted as pieces with visible embedded sediment layers and no surface sediment. Ice fragments were boxed in opaque containers and allowed to melt at an ambient temperature of 5–10°C. Total volume loss over 48 hours was ~20% of ice volume.

## Supplementary References

- Campbell, J. A., & Yeats, P. A. (1982). The distribution of manganese, iron, nickel, copper and cadmium in the waters of Baffin Bay and the Canadian Arctic Archipelago. *Oceanologica Acta*, 5(2).  
<https://doi.org/10.1007/s00128-002-0077-7>,
- Cantoni, C., Hopwood, M. J., Clarke, J. S., Chiggiato, J., Achterberg, E. P., & Cozzi, S. (2020). Glacial drivers of marine biogeochemistry indicate a future shift to more corrosive conditions in an Arctic fjord. *Journal of Geophysical Research: Biogeosciences*, 125, e2020JG005633. <https://doi.org/10.1029/2020JG005633>
- De Baar, H. J. W., De Jong, J. T. M., Bakker, D. C. E., Loscher, B. M., Veth, C., Bathmann, U., & Smetacek, V. (1995). Importance of iron for plankton blooms and carbon dioxide drawdown in the Southern Ocean. *Nature*, 373, 412–415. <https://doi.org/10.1038/373412a0>
- Forsch, K. O., Hahn-Woernle, L., Sherrell, R. M., Rocanova, V. J., Bu, K., Burdige, D., Vernet, M., & Barbeau, K. A. (2021). Seasonal dispersal of fjord meltwaters as an important source of iron and manganese to coastal Antarctic phytoplankton. *Biogeosciences*, 18(23), 6349–6375.  
<https://doi.org/10.5194/bg-18-6349-2021>
- Höfer, J., Giesecke, R., Hopwood, M. J. M. J., Carrera, V., Alarcón, E., & González, H. E. H. E. (2019). The role of water column stability and wind mixing in the production/export dynamics of two bays in the Western Antarctic Peninsula. *Progress in Oceanography*, 174, 105–116.  
<https://doi.org/10.1016/j.pocean.2019.01.005>
- Hopwood, M. J., Cantoni, C., Clarke, J. S., Cozzi, S., & Achterberg, E. P. (2017). The heterogeneous nature of Fe delivery from melting icebergs. *Geochemical Perspectives Letters*, 3(2), 200–209.  
<https://doi.org/10.7185/geochemlet.1723>
- Hopwood, M. J., Carroll, D., Höfer, J., Achterberg, E. P., Meire, L., Le Moigne, F. A. C., Bach, L. T., Eich, C., Sutherland, D. A., & González, H. E. (2019). Highly variable iron content modulates iceberg-ocean fertilisation and potential carbon export. *Nature Communications*, 10(1), 5261.  
<https://doi.org/10.1038/s41467-019-13231-0>
- Hopwood, M. J., Connelly, D. P., Arendt, K. E., Juul-Pedersen, T., Stinchcombe, M. C., Meire, L., Esposito, M., & Krishna, R. (2016). Seasonal changes in Fe along a glaciated Greenlandic fjord. *Frontiers in Earth Science*, 4. <https://doi.org/10.3389/feart.2016.00015>
- Krause, J., Hopwood, M. J., Höfer, J., Krisch, S., Achterberg, E. P., Alarcón, E., Carroll, D., González, H. E., Juul-Pedersen, T., Liu, T., Lodeiro, P., Meire, L., & Rosing, M. T. (2021). Trace Element (Fe, Co, Ni and Cu) Dynamics Across the Salinity Gradient in Arctic and Antarctic Glacier Fjords. *Frontiers in Earth Science*, 9, 878. <https://doi.org/10.3389/feart.2021.725279>
- Lin, H., Rauschenberg, S., Hexel, C. R., Shaw, T. J., & Twining, B. S. (2011). Free-drifting icebergs as sources of iron to the Weddell Sea. *Deep-Sea Research Part II-Topical Studies in Oceanography*, 58(11–12), 1392–1406. <https://doi.org/10.1016/j.dsr2.2010.11.020>
- Loscher, B. M., DeBaar, H. J. W., DeJong, J. T. M., Veth, C., & Dehairs, F. (1997). The distribution of Fe in the Antarctic Circumpolar Current. *Deep-Sea Research Part II-Topical Studies in Oceanography*, 44(1–2), 143–187. [https://doi.org/10.1016/S0967-0645\(96\)00101-4](https://doi.org/10.1016/S0967-0645(96)00101-4)

- 71 Martin, J. H., Gordon, R. M., & Fitzwater, S. E. (1990). Iron in Antarctic waters. *Nature*, 345, 156–158.  
72 <https://doi.org/10.1038/345156a0>
- 73 Meire, L., Meire, P., Struyf, E., Krawczyk, D. W., Arendt, K. E., Yde, J. C., Juul Pedersen, T., Hopwood, M.  
74 J., Rysgaard, S., & Meysman, F. J. R. (2016). High export of dissolved silica from the Greenland Ice Sheet.  
75 *Geophysical Research Letters*, 43(17). <https://doi.org/10.1002/2016GL070191>
- 76 Wuttig, K., Townsend, A. T., van der Merwe, P., Gault-Ringold, M., Holmes, T., Schallenberg, C., Latour,  
77 P., Tonnard, M., Rijkenberg, M. J. A., Lannuzel, D., & Bowie, A. R. (2019). Critical evaluation of a seaFAST  
78 system for the analysis of trace metals in marine samples. *Talanta*, 197, 653–668.  
79 <https://doi.org/10.1016/j.talanta.2019.01.047>
